# Supplementary material for: Large variations in iron input to an oligotrophic Baltic Sea estuary: impact on sedimentary phosphorus burial
Source: Copernicus journal article supplement (doi:10.5194/bg-15-6979-2018), 2018-11-21
Supplement: Supplementary file 1 [file CH4_overview.xlsx]

## Sheet: NB1 april
depth	CH4
cm	mmol/L
0	0
1.5	0.0015
4	0.004
6.5	0.0065
9	0.009
11.5	0.0115

## Sheet: NB1 aug
depth	CH4
cm	mmol/L
0	0.000236111
3	0.000216853
5.5	0.00043389
8	0.00062673
10.5	0.0019671
13	0.00337332

## Sheet: N6 april
depth	CH4
cm	mmol/L
3.2	0.0019
5.7	0.00133798
8.2	0.00176686
10.7	0.00162875
13.2	0.00145922
15.7	0.00365359
18.2	0.00278966
20.7	0.00308342
23.2	0.00205

## Sheet: N6 aug
depth	CH4
cm	mmol/L
0	9.92006e-05
1.5	0.000109384
4	0.000166534
6.5	0.000384814
9	0.000407291
11.5	0.0004911
14	0.00125417
16.5	0.000851474
19	0.00080191
21.5	0.00264805
24	0.002384

## Sheet: N10 april
depth	CH4
cm	mmol/L
0	0.000272952
3.9	0.000687117
6.4	0.00108134
8.9	0.00236561
11.4	0.00445546
13.9	0.00679359
16.4	0.00999563
18.9	0.0141665
21.4	0.0212824
23.9	0.0292213
26.4	0.0363111
28.9	0.0800503
31.4	0.1516
33.9	0.2137
36.4	0.343776

## Sheet: N10 aug
depth	CH4
cm	mmol/L
0	0.000181717
1.5	0.000136873
4	0.000223403
6.5	0.00402961
9	0.00035641
11.5	0.000569458
14	0.00182734
16.5	0.00290365
19	0.0036246
21.5	0.00444107
24	0.00460724
26.5	0.0104317
29	0.0181655
31.5	0.0450615
34	0.0868626
36.5	0.0968251

## Sheet: N7 april
depth	CH4
cm	mmol/L
0	0.00059294
2.2	0.000641074
4.7	0.000556131
7.2	0.00115428
9.7	0.00153016
12.2	0.00191728
14.7	0.00220201
17.2	0.00331287
19.7	0.00539379
22.2	0.0216735
24.7	0.0763935
27.2	0.240663
29.7	0.422613
32.2	0.557275
34.7	0.994858
37.2	1.038

## Sheet: N7 aug
depth	CH4
cm	mmol/L
0	0.000263514
1	0.000264771
3.5	0.000257795
6	0.000195901
8.5	0.000367801
11	0.000857791
13.5	0.00192134
16	0.00640178
18.5	0.0280621
21	0.0763118
23.5	0.316869
26	0.748295
28.5	0.971927
31	1.37666
33.5	1.58144
33.5	1.59446
36	1.87663
38.5	2.26585
38.5	2.27293
38.5	2.27588
41	2.60709
43.5	2.15356
43.5	2.19107
46	2.40529

## Sheet: NB8 april
depth	CH4
cm	mmol/L
0	0.000641408
3.5	0.0144404
6	0.0642691
8.5	0.171879
11	0.300284
13.5	0.446311
16	0.68929
18.5	1.10249
21	1.60934
23.5	2.09
26	2.36361
28.5	3.27249
31	3.56375
33.5	4.41961
43.5	4.33181
46	3.61539
48.5	3.84802

## Sheet: NB8 aug
depth	CH4
cm	mmol/L
0	0.00281845
1.5	0.00321828
4	0.00831133
6.5	0.025789
9	0.110903
11.5	0.50518
14	0.888861
16.5	1.71193
19	2.73228
21.5	3.84561
24	3.164
26.5	4.40818
29	4.91241
31.5	4.78873
34	5.7
36.5	5.69909
39	5.78234
41.5	5.69941
44	5.19106
46.5	4.02317
49	5.06679
