# Supplementary material for: Large variations in iron input to an oligotrophic Baltic Sea estuary: impact on sedimentary phosphorus burial
Source: Copernicus journal article supplement (doi:10.5194/bg-15-6979-2018), 2018-11-21
Supplement: Supplementary file 2 [file PW_overview.xlsx]

## Sheet: NB1 april
Depth	SO42-	H2S	Fe2+	Mn2+	NH4+	HPO42-	DIC
cm	mmol/L	μmol/L	μmol/L	μmol/L	mmol/L	mmol/L	mmol/L
0	4.03664	0	1.79067	0		3.22851
0.5	4.10462	0.468425	5.37201	18.2023	3.46912	3.22851	1.40924
1.5	4.1193	0	147.551	12.7416	25.319	6.45703
2.5	4.02009	0	124.452	9.10117	52.4626	9.68554	1.45083
3.5	3.89538	0	64.4641	9.10117	61.0982	6.45703	1.53438
4.5	3.88268	0	23.2787	7.28093	77.4608	6.45703	1.71404
5.5	3.75755	0	21.488	7.28093	68.9283	9.68554	1.71146
6.5	3.66354	0	19.6974	7.28093	81.264	9.68554	1.81383
7.5	3.58692	0	16.116	7.28093	91.5368	9.68554	1.8607
8.5	3.56319	0	5.37201	9.10117	117.823	6.45703	1.94898
9.5	3.39017	0	16.116	10.9214	137.487	9.68554	1.98286
11	3.23912	0	50.1388	16.3821	133.585	48.4277	2.30965
13	2.96065	0.23678	64.4641	21.8428	175.119	77.4843	2.5981
15	2.78971	0.23678	71.6268	27.3035	208.657	90.3984	2.88539
17	2.48678	0.005135	71.6268	32.7642	251.765	112.998	3.26555
19.5		0.005135	66.2548	38.2249	270.682	125.912
22	2.0126	0.23678	53.7201	40.0451	311.792	129.141	4.03463
24	1.82251	0.23678	51.9294	41.8654	318.428	138.826
26	1.65646	0.468425	39.3948	43.6856	323.943	148.512
28	1.6	2.32158	26.8601	43.6856	366.988	138.826
30	1.5253	1.16336	21.488	43.6856	342.63	148.512
32	1.43213	1.62665	16.116	43.6856	389.609	148.512

## Sheet: NB1 aug
Depth	SO42-	H2S	Fe2+	Mn2+	NH4+	HPO42-	DIC
cm	mmol/L	μmol/L	μmol/L	μmol/L	mmol/L	mmol/L	mmol/L
0	4.27374	1.45325	12.4452	0.910116	0	7.10279	7.49504
0.5	4.51229	0	22.2043	10.9214	13.422	7.10279	3.49541
1.5	4.35207	0.169311	68.0455	6.18879	20.6735	7.42564
2.5	4.25985	1.8342	86.8475	5.82474	18.9203	8.71706	4.32121
3.5	4.28086	0.225748	61.5991	5.64272	14.9794	7.74849	5.5
4.5	4.28869	0.395059	46.9156	5.64272	19.4997	7.42564
5.5	4.31326	0.141092	56.2271	6.37081	21.8243	11.9456	3.6438
6.5	4.27445	0.282185	20.2346	5.82474	19.8349	6.45708
7.5	4.23208	1.49558	39.3948	8.00902	31.5755	17.4341	5.35589
8.5	4.14627	0.677244	44.9458	12.1956	33.6267	26.1512	5.03383
9.5	4.01168	0.451496	42.4389	16.7461	63.3706	31.3168	7.89137
11	3.66061	1.24161	73.9547	25.8473	116.255	94.2733	8.12123
13	3.18634	2.00351	85.9522	32.5822	155.519	117.196	9.27052
15	2.45109	1.74955	79.1476	40.7732	227.21	125.913	9.69246
17	2.18084	1.04408	99.0241	45.3238	264.08	155.293	9.92424
19	1.90988	1.43914	61.42	44.4137	267.695	105.25	11.4013
21	1.61293	3.58375	60.1665	48.7822	321.296	181.767	12.6556
23	1.38256	2.70898	51.0341	49.6923	326.492	183.381	13.0878
25	1.27112	3.13225	47.2737	49.8744	316.341	186.287	7.67752
27	1.04217	2.31392	32.5902	48.0541	341.946	191.452	12.8727
29	0.913283	3.30156	23.4578	48.2362	349.507	171.435	13.1128
31	0.789019	4.74071	22.0252	46.4159	345.954	199.524	13.5078
32.5	0.819996	5.27686	24.5322	45.3238	348.236	134.307

## Sheet: N6 april
Depth	SO42-	H2S	Fe2+	Mn2+	NH4+	HPO42-	DIC
cm	mmol/L	μmol/L	μmol/L	μmol/L	mmol/L	mmol/L	mmol/L
0	3.90069	0	2.68601	0.910117	0	4.84277	1.58256
0.5	4.01124	0.23678	75.2082	25.4833	21.0219	6.45703	1.53087
1.5		0	108.515	21.8428	33.1567	6.45703	1.69835
2.5	3.74256	0.23678	176.202	18.2023	50.3808	25.8281	1.65117
3.5	3.65688	0.468425	100.278	16.3821	58.6362	9.68554	1.91106
4.5	3.50396	0	96.6962	16.3821	70.6443	16.1426	1.96021
5.5	3.38122	0.005135	78.7895	16.3821	91.1529	16.1426	2.11307
6.5	3.28899	0.931715	98.4869	18.2023	99.8517	25.8281	2.27044
7.5	3.15553	0.468425	84.1615	18.2023	111.883	16.1426	2.42257
8.5	3.07037	0.468425	104.933	21.8428	117.903	32.2851	2.56294
9.5	3.02113	1.16336	135.554	25.4833	127.265	54.8847	2.80979
11	2.83344	0.005135	155.251	30.944	154.153	64.5703
13	2.66052	0.70007	166.353	34.5844	170.757	74.2558	3.55849
15	2.53862	0.23678	172.442	40.0451	179.002	80.7129
17	2.26723	0.23678	167.786	43.6856	206.684	90.3984	4.38645
19	2.08411	0.005135	147.372	45.5058	241.125	80.7129
21	1.7589	0.23678	162.414	52.7868	251.67	109.769	5.21008
23	1.50562	1.16336	161.16	56.4272	255.673	122.684
25	1.2387	0.23678	158.116	60.0677	281.311	132.369	5.88931
27	0.981366	0.468425	155.788	65.5284	306.302	142.055
29	0.748386	0.70007	145.582	67.3486	303.506	142.055	6.54267
31	0.530294	0.70007	154.893	70.9891	320.877	158.197
33	0.360087	0.70007	76.9988	65.5284	342.685	90.3984	7.39878
35	0.185509	0.468425	87.7429	72.8093	370.873	122.684
37	0.0534041	0	30.4414	67.3486	363.025	58.1133

## Sheet: N6 aug
Depth	SO42-	H2S	Fe2+	Mn2+	NH4+	HPO42-	DIC
cm	mmol/L	μmol/L	μmol/L	μmol/L	mmol/L	mmol/L	mmol/L
0	3.55185	0.38095	6.53595	1.18315	3.99995	5.16566	8.709
0.5	3.55465	0.620807	13.7882	9.46521	7.07015	7.10279	7.12112
1.5	3.57649	0.310404	9.49055	18.7484	22.0297	5.48852	5.87451
2.5	3.53314	0.056437	78.9686	13.4697	30.4146	7.42564
3.5	3.38999	1.5238	90.787	9.10116	28.6482	13.8827	8.75
4.5	3.39404	0.423277	94.9055	9.82925	33.1717	13.5599	8.06232
5.5	3.31545	0.253967	92.7567	12.1956	40.2017	8.71706	8.39655
6.5	3.34383	0.56437	135.196	15.654	48.1547	14.5284	7.66663
7.5	3.3061	0.592588	158.116	18.5664	58.6397	20.6626	9.24747
8.5	3.26898	0.56437	150.416	21.6608	63.9981	16.7884	9.71679
9.5	3.15827	0.282185	129.107	24.0271	76.2154	13.5599
11	3.05879	0.677244	176.918	27.3035	97.6322	24.8598	9.64828
13	2.99454	0.7619	208.434	33.3102	104.786	44.5538	8.7519
15	2.82426	2.39857	250.336	37.8608	119.809	69.0907	8.36197
17	2.67644	1.32627	103.322	45.3238	136.651	14.2056	10.3673
19	2.55076	0.959429	291.521	39.8631	146.115	90.0762	10.1528
21	2.36894	1.24161	265.377	45.5058	153.02	70.705	11.2426
23	2.2233	1.2134	282.926	48.6002	164.054	90.0762	11.0716
25	2.08109	1.32627	287.403	50.7845	180.366	101.699	9.46836
27	1.91798	1.38271	293.133	52.7867	191.038	110.093	10.0645
29	1.79136	1.86242	280.777	53.8789	198.091	112.676	11.05
31	1.71152	1.43914	275.047	55.3351	206.86	117.842	11.516
33	1.58958	1.55202	267.705	56.0632	209.224	121.393	10.6228
35	1.47606	1.38271	289.372	57.5193	224.637	134.63	12.9329
37	1.37065	1.15696	262.87	57.1553	233.23	131.402	11.1401
39	1.24684	1.18518	261.617	57.5193	246.056	135.921
41	1.14892	1.24161	246.933	56.0632	246.864	136.244

## Sheet: N10 april
Depth	SO42-	H2S	Fe2+	Mn2+	NH4+	HPO42-	DIC
cm	mmol/L	μmol/L	μmol/L	μmol/L	mmol/L	mmol/L	mmol/L
0	4.038	0	1.79067	0.163821	0	3.22851
0.5	3.98678	0.005135	7.16268	34.5844	0	6.45703	1.73061
1.5	3.9391	0	51.9294	110.306	0	6.45703	1.96858
2.5	3.91078	0	216.313	89.1915	37.1932	9.68554	2.01534
3.5	3.89361	0	272.719	54.607	51.888	22.5996	2.00719
4.5	3.77347	0.931715	185.334	34.5844	52.0211	16.1426	1.97135
5.5	3.73995	0	96.6962	25.4833	47.7509	16.1426	2.02433
6.5	3.73933	0	66.2548	18.2023	50.1395	12.9141	1.92054
7.5	3.73704	0	55.5108	16.3821	46.2386	9.68554	1.901
8.5	3.68447	0	57.3015	14.5619	38.1672	12.9141	1.86148
9.5	3.64949	0.005135	69.8362	12.7416	46.366	16.1426	1.93445
11	3.49126	0.005135	85.9522	14.5619	59.1332	22.5996	2.01353
13	3.32334	0	97.2334	21.8428	77.2848	38.7422
15	3.10296	0	107.619	27.3035	106.31	45.1992	2.29612
17	2.8553	0.468425	101.71	34.5844	128.052	71.0273
19	2.56746	1.39501	107.44	41.8654	151.345	93.6269	2.68902
21	2.39985	1.62665	76.9988	43.6856	170.042	96.8554
23	2.19758	1.39501	64.4641	47.3261	173.537	109.769	3.28188
25	2.02176	1.39501	55.5108	47.3261	201.699	116.227
27	1.79731	0.931715	51.9294	49.1463	228.812	132.369	3.8107
29	1.6319	0.931715	48.3481	47.3261	212.511	135.598
31	1.49364	0.468425	57.3015	47.3261	241.143	145.283	4.33399
33	1.32615	0.70007	53.7201	45.5058	259.044	145.283
35	1.21393	0.70007	53.7201	45.5058	258.227	142.055	4.66111
37	1.16899	0.70007	51.9294	41.8654	258.363	145.283
39	1.15538	0.70007	48.3481	40.0451	260.738	142.055	4.92574
41	1.0951	0.23678	39.3948	38.2249	276.64	135.598
43	1.06683	0.23678	35.8134	36.4047	267.829	129.141	5.04029
45	1.04557	0.468425	28.6507	34.5844	269.522	129.141
47	1.01496	0.468425	19.6974	30.944	274.83	109.769

## Sheet: N10 aug
Depth	SO42-	H2S	Fe2+	Mn2+	NH4+	HPO42-	DIC
cm	mmol/L	μmol/L	μmol/L	μmol/L	mmol/L	mmol/L	mmol/L
0	3.56853	0.169311	3.04414	1.27416	1.50322	4.84281	7.60005
0.5	3.63512	0.310404	76.1035	13.6517	20.9177	6.45708	5.15164
1.5	3.64354	0.959429	186.946	10.3753	32.034	14.8513	9.63868
2.5	3.6189	0.507933	260.184	11.6495	31.8036	30.994	7.92402
3.5	3.61048	0.225748	149.163	10.0113	33.7578	16.4655	4.79629
4.5	3.61173	1.24161	71.4478	8.73711	26.7067	8.07135	9.53111
5.5	3.59582	0.141092	36.5297	8.55509	29.5076	5.48852	7.81902
6.5	3.64915	0.112874	12.1766	8.55509	34.0937	5.16566	8.88315
7.5	3.59114	1.35449	43.3342	9.28318	29.6997	8.07135	9.18664
8.5	3.6111	1.24161	39.2157	9.82925	31.3819	7.42564	8.84154
9.5	3.60861	0.7619	34.3809	9.64723	33.3488	6.77993	10.2693
11	3.50382	0.93121	61.9572	12.5596	44.9947	18.4027	8.24352
13	3.25402	2.11639	71.985	19.1124	73.9701	36.8053	9.12198
15	2.79495	2.00351	87.5638	28.9417	127.858	71.9964	10.375
17	2.402	2.42679	87.9219	35.3125	183.609	89.4305	9.09828
19	2.03867	3.0476	81.2964	40.2271	205.552	106.542	9.27756
21	1.61484	2.56788	74.3128	45.3238	240.455	127.204	12.2228
23	1.41525	3.01938	68.2246	46.962		132.693	11.9577
25	1.10058	2.45501	57.3015	49.1463	264.595	156.584	0.348309
27	0.823639	2.14461	44.7668	50.0564	310.569	138.181	14.3447
29	0.568533	2.76541	40.111	51.5126	328.42	160.458	13.4579
31	0.370497	3.18869	37.425	52.9688		200.169	12.9124
33	0.233978	1.94708	34.9181	53.6969	380.236	194.681	14.41
35	0.103084	1.18518	25.7857	53.6969	388.213	128.173	11.9622
37	0.0600686	2.45501	53.5411	57.7014	386.86	209.209	11.3757
39	0.0642351	3.55553	83.6243	57.3373		204.044	13.3708
41.5	0.0553532	2.96294	148.088	60.7958	434.412	213.084	15.6022
44.5	0.0328583	2.17282	172.979	60.2497	452.443	202.752	14.6706
47.5	0.0246094	2.76541	207.36	61.8879	481.385	212.761	15.0586
50.5	0.0275815	3.18869	219.894	61.1598		209.209	13.8382
53.5	0.0277218	3.58375	220.611	59.1575	451.27	201.461	14.031
56	0.0619928	2.93472	350.076	56.0632	492.72	188.224

## Sheet: N7 april
Depth	SO42-	H2S	Fe2+	Mn2+	NH4+	HPO42-	DIC
cm	mmol/L	μmol/L	μmol/L	μmol/L	mmol/L	mmol/L	mmol/L
0	4.03582	0.005135	7.16268	0.345844	0	6.45703
0.5	3.89678	0	12.5347	63.7082	0	6.45703	1.82431
1.5	3.83578	0	287.761	45.5058	35.6039	16.1426	2.12953
2.5	3.71264	0.468425	370.132	38.2249	18.0611	19.3711	2.2127
3.5	3.63499	0.005135	429.224	34.5844	50.1405	35.5137	2.25862
4.5	3.42506	0.70007	419.912	34.5844	65.898	41.9707	2.32267
5.5	3.14152	0	353.478	32.7642	91.0953	32.2851	2.29646
6.5	2.92563	0	434.775	30.944	126.456	103.312	2.26366
7.5	2.71529	0	270.212	29.1237	136.545	32.2851	2.28213
8.5	2.56474	0	98.4869	25.4833	128.892	6.45703	2.27129
9.5	2.43726	0.23678	152.923	27.3035	129.682	54.8847	2.31782
11	2.21447	0.23678	127.317	32.7642	149.678	83.9414	2.59265
13	1.83527	0.005135	110.305	45.5058	169.512	74.2558
15	1.34445	0	84.1615	61.8879	219.031	67.7988	3.8883
17	0.81548	0.931715	122.84	87.3712	264.1	135.598
19	0.341984	1.39501	100.278	109.214	336.58	174.34	5.70889
21	0.0838747	1.85829	96.6962	130.329	374.166	193.711
23	0.0763065	3.24817	280.598	156.904	420.473	193.711	7.15475
25	0.107735	1.16336	416.152	180.021	489.262	216.31
27	0.0451072	1.62665	497.985	198.223	500.304	213.082	7.54441
29	0.0607641	1.16336	544.901	214.97	590.135	203.396
31	0.0444097	1.16336	592.891	227.165	642.007	209.853	8.16671
33	0.0261503	1.16336	638.553	241.909	694.694	203.396
35	0.0127212	1.16336	661.653	248.826	734.403	213.082	8.87986
37	0.00925463	3.01652	703.196	259.565	837.441	200.168
39	0.00835936	1.62665	565.673	249.008	833.519	0	9.60845
41	0.0216115	0.931715	763.005	275.401	838.667	174.34
43	0.0188112	0.931715	824.962	288.143	831.047	171.111	10.0716
45	0.0165938	0.70007	852.896	295.788	929.297	132.369
47	0.00734957	0.70007	893.903	304.889	963.381	112.998	10.5725
49	0.0146887	0.70007	934.73	303.979	966.986	119.455
51	0.014595	0	856.657	303.069	948.19	0
53	0.020862	0.931715	1056.85	316.903	986.203	119.455
55	0.0080991	0.70007	1071.72	320.907	1094.34	93.6269
57	0.00521549	0.70007	476.497	327.824	1077.12	112.998

## Sheet: N7 aug
Depth	SO42-	H2S	Fe2+	Mn2+	NH4+	HPO42-	DIC
cm	mmol/L	μmol/L	μmol/L	μmol/L	mmol/L	mmol/L	mmol/L
0	3.33713	0	6.26735	3.00338	3.56083	4.51995	4.51905
0.5	3.47762	0	153.102	16.018	49.2613	6.77993	5.17648
1.5	3.48199	0	230.28	20.0226	54.9438	13.237	2.93325
2.5	3.4533	0.0846555	242.994	23.845	59.0939	11.9456	3.47
3.5	3.3956	0	105.112	26.9394	63.3533	7.74849	5.03887
4.5	3.29736	0	288.298	27.1215	68.835	39.3882	6.24048
5.5	3.34539	0.0846555	185.693	25.8473	66.3426	15.8198	5.76247
6.5	3.39591	0	95.8009	21.2967	59.4638	10.0085	5.31014
7.5	3.41993	0	66.4339	20.3866	66.738	16.4655	5.55178
8.5	3.36753	0	40.2901	18.3843	58.4584	11.6227	6.79619
9.5	3.39966	0	31.6949	17.6563	63.1477	12.9142	5.79342
11	3.32668	0.197529	56.2271	18.5664	62.4185	32.9311	5.71177
13	3.19538	0.56437	60.7037	21.1147	82.9155	44.8767	5.02702
15	2.77499	1.2134	70.0152	30.5799	125.387	84.2649	8.09261
17	1.96507	1.49558	59.9875	47.326	196.98	165.947	9.13489
19	1.03072	6.26451	26.1438	68.0767	287.237	251.18	11.3129
21	0.35085	8.29624	10.744	89.0094	364.483	270.229	10.771
23	0.117284	12.5572	30.4414	108.668	409.924	319.948	14.7614
25	0.0953064	3.0476	162.772	125.96	465.778	315.751	14.47
27	0.112824	2.51145	263.945	137.246	507.723	312.2	11.3017
29	0.0990956	2.45501	369.415	156.176	577.733	302.191	13.2143
31	0.0591486	1.04408	374.25	162.183		207.272	13.175
33	0.0740465	0.395059	239.234	158.724	597.316	70.0593	16.9797
35	0.0499174	0.620807	371.385	176.381	679.721	95.2419	17.7785
37	0.0604429	1.12874	555.466	199.679		255.055	17.6473
39	0.051826	1.77777	605.247	210.783	712.906	210.501	18.3411
41.5	0.0495119	1.94708	680.992	222.978	756.93	238.589	19.68
44.5	0.037399	1.38271	724.147	234.264	779.757	221.478	15.804
47.5	0.0365788	0.818337	774.286	244.457		234.715	20.5144
50.5	0.0363792	1.2134	813.502	250.828	908.311	219.864	15.6802
53.5	0.0479058	0.790118	785.746	248.28	944.346	131.724	12.0461
56.5	0.0340901	0.507933	717.164	246.095	1014.37	84.9106	19.2955
59.5	0.0308218	0.310404	678.843	243.001	1042.76	45.1995	19.4343

## Sheet: NB8 april
Depth	SO42-	H2S	Fe2+	Mn2+	NH4+	HPO42-	DIC
cm	mmol/L	μmol/L	μmol/L	μmol/L	mmol/L	mmol/L	mmol/L
0	4.12725	0	14.286	9.10117	0	6.45703
0.5	4.10839	0	9.23628	54.607	0	6.45703	1.49939
1.5	3.87773	0	164.204	34.5844	0	9.68554	1.85076
2.5	3.82903	0	177.993	32.7642	0	9.68554	1.98531
3.5	3.80497	0	219.178	30.944	0	19.3711	2.06967
4.5	3.67563	0	156.505	32.7642	24.9241	9.68554	2.24016
5.5	3.52074	0.468425	134.121	32.7642	35.0338	9.68554	2.36408
6.5	3.39159	0	107.44	30.944	44.6144	9.68554	2.40431
7.5	3.22945	0	102.605	29.1237	78.7644	9.68554	2.55715
8.5	2.96958	0.005135	87.7429	29.1237	133.229	9.68554	2.65506
9.5	2.67772	0.70007	82.0127	27.3035	171.363	12.9141	2.7607
11	2.30839	0.23678	139.672	29.1237	239.728	93.6269	3.05685
13	1.51646	3.01652	22.9206	34.5844	302.335	132.369
15	0.730929	149.349	0	50.9665	484.194	148.512	3.90889
17	0.286227	201.744	2.71466	78.27	570.053	174.34
19	0.118884	168.469	4.70946	109.214	768.749	190.482	5.71009
21	0.0532584	79.8209	35.9925	141.614	840.641	203.396
23	0.0519051	7.88107	314.442	175.289	984.382	232.453	7.52911
25	0.0442015	2.08994	626.198	208.053	1018.53	242.139
27	0.0470539	1.39501	879.219	241.181	1189.77	242.139	8.92996
29	0.0524672	1.16336	1043.07	270.487	1209.36	232.453
31	0.0371955	2.08994	1145.38	295.242	1241.26	196.939	9.76268
33	0.0439829	1.39501	1145.38	310.35	1297.2	177.568
35.5	0.0379034	1.39501	1241.19	333.467	1452.94	145.283	10.6303
38.5	0.014595	1.16336	1459.32	375.15	1617.83	138.826
39				0			11.0722
41.5	0.0155007	1.16336	1691.43	417.744	1808.96	138.826
43				0			11.6776
44.5	0.0111389	1.62665	1794.25	440.861	1735.67	132.369
47				0			11.9808
47.5	0.00853633	1.62665	1862.3	462.521	1868.66	112.998
50.5	0.0111389	1.16336	1826.48	477.629	1905.85	61.3418
53.5	0.00978555	0.931715	1953.62	502.202	1994.33	90.3984
56.5	0.00593379	1.39501	2009.13	522.771	2056.56	103.312
59.5	0.00811993	1.39501	2087.92	542.976	2081.25	100.084
62.5	0.00832813	1.62665	1984.06	540.245	1953.47	96.8554
65.5	0.0116594	1.16336	1917.81	532.054	2245.62	103.312
68.5	0.0121799	1.16336	1779.69	494.193	2330.33	93.6269
71	0.0305018	1.16336	1935.71	538.425	2205.17	96.8554

## Sheet: NB8 aug
Depth	SO42-	H2S	Fe2+	Mn2+	NH4+	HPO42-	DIC
cm	mmol/L	μmol/L	μmol/L	μmol/L	mmol/L	mmol/L	mmol/L
0	3.81241	0.056437	3.31274	1.09214	7.45155	4.84281	3.22756
0.5	3.77546	2.11639	55.1527	17.2922	35.3758	5.48852	2.77457
1.5	3.76704	0.733681	282.389	13.4697	44.5391	33.5768	3.62525
2.5	3.77764	0.592588	196.616	11.6495	45.1275	18.7255	5.49581
3.5	3.71589	0.902992	123.377	10.1933	50.142	11.2999	4.24284
4.5	3.71807	0.790118	72.7012	9.64723	55.3107	11.2999	3.51727
5.5	3.60424	0.902992	14.8626	9.10116	57.6495	10.0085	3.87018
6.5	3.3956	6.46204	18.4439	14.0158	88.2734	31.6397	9.99544
7.5	2.97583	0.902992	10.3859	16.2001		9.68562
8.5	2.46499	2.62432	6.26735	21.2967	207.295	34.5454	10.726
9.5	1.93981	11.2874	5.19294	27.3035	281.512	56.8223	18.131
11	1.40777	330.1	3.04414	37.6788	345.985	94.919	3.94655
13	0.683611	385.295	2.86507	55.8811	461.773	118.487	6.58418
15	0.280072	358.206	2.50694	73.9014	519.031	134.953	1.95353
17	0.119407	322.453	11.8184	96.6543	578.122	162.396	8.97357
19	0.0892157	165.812	3.58134	134.879	634.409	177.247	15.5152
21	0.0540278	44.557	13.0719	159.998		203.721	19.4212
23	0.0891969	4.37387	174.949	179.657	711.81	180.475	20.4075
25	0.078606	3.13225	393.231	206.778		213.729	23.7303
27	0.0707781	2.53966	536.127	211.147	919.264	160.458	19.9612
29	0.0735506	2.53966	731.489	236.448		207.595	20.1056
31	0.0833151	2.45501	796.848	247.552	1058.27	205.012	21.5589
33	0.0642788	1.55202	926.672	268.12	1114.61	137.859	26.0405
35	0.06092	2.14461	1047.72	289.781	1151.77	207.918	29.2321
37	0.059685	2.5961	1121.34	309.439	1221.93	209.209	27.7226
39	0.0584188	1.58024	1151.19	322.909	1311.4	171.113	21.8
41.5	0.0606674	2.68076	1255.73	346.936		205.981	29.864
44.5	0.0656479	2.34214	1245.2	350.941	1375.35	199.201	26.6087
47.5	0.0665461	2.34214	1285.72	368.961		195.327	30.9029
50.5	0.0639732	1.77777	1320.91	378.972	1467.26	197.264	24.4841
53.5	0.0652893	2.37035	1320.35	382.249	1570.67	199.847	28.1388
56.5	0.0638765	2.5961	1280.28	379.518	1604.21	187.578	24.5498
59.5	0.0646156	2.34214	1271.21	381.885		203.398	26.2656
62	0.0696772	1.38271	1098.83	362.772	1616	102.668	30.3797
