# Supplementary material for: Large variations in iron input to an oligotrophic Baltic Sea estuary: impact on sedimentary phosphorus burial
Source: Copernicus journal article supplement (doi:10.5194/bg-15-6979-2018), 2018-11-21
Supplement: Supplementary file 3 [file SP_overview.xlsx]

## Sheet: NB1
depth	Porosity	Al	Fe tot	Mn tot	P tot	S tot
cm	%	μmol/g	μmol/g	μmol/g	μmol/g	μmol/g
0.5	92.2179	2219.76	623.892	8.39019	49.4295	58.5498
1.5		2280.73	572.923	7.14897	37.4814	81.3866
2.5	92.3892	2342.95	642.011	7.04194	32.7223	161.198
3.5	90.2425	2326.41	536.873	6.78365	27.8592	107.571
4.5	90.6716	2446.9	640.121	6.94874	29.7194	138.278
5.5	91.1314	2712.05	795.383	7.79224	30.5108	227.46
6.5	90.819	2575.11	791.899	7.92239	29.1632	230.371
7.5	91.1809	2547.1	806.194	7.47497	28.44	261.989
8.5	89.5434	2558.74	722.635	7.78114	29.6168	212.506
9.5	89.6328	2535.59	751.953	7.6914	29.5332	185.505
11	89.0709	2602.52	768.042	8.16156	30.9163	184.081
13	90.8542	2432.34	839.213	8.95428	34.332	292.828
15	91.3531	2513.46	876.034	10.3286	40.4191	289.091
17	88.2707	2472.98	716.386	8.91842	35.0307	176.935
19.5	88.3265	2525.71	741.027	8.85134	31.0698	184.46
22	87.8002	2481.35	704.186	8.42477	29.1351	195.936
24	87.5425	2608.14	731.741	9.02363	28.8691	167.228
26	85.2671	2510.62	606.243	8.36288	29.1667	101.765
28	82.9706	2566.99	554.283	7.94896	28.5004	67.2674
30	84.1778	2642.59	620.27	8.77316	27.9115	78.6215
32	80.2268	2518.45	462.349	7.20922	25.3503	50.8661

## Sheet: N6
depth	Porosity	Al	Fe tot	Mn tot	P tot	S tot
cm	%	μmol/g	μmol/g	μmol/g	μmol/g	μmol/g
0.5	87.6723	2178.51	669.199	16.8492	51.058	22.7681
1.5	84.631	2322.45	566.083	8.23656	39.1283	22.1597
2.5	84.3895	2444.03	569.762	7.70159	33.2786	46.2136
3.5	84.873	2495.34	618.116	7.84857	28.451	74.5902
4.5	82.731	2478	580.301	7.48589	27.9528	71.4446
5.5		2464.55	504.145	7.25873	28.2592	53.2818
6.5	83.7344	2565.36	630.76	7.76457	28.1249	85.1764
7.5	83.928	2539.21	616.974	7.95369	28.5672	86.0274
8.5	85.5536	2477.5	662.27	7.7724	27.7078	129.145
9.5	84.822	2479.51	639.741	7.79315	27.8957	119.633
11	85.5789	2479.44	702.632	7.99683	27.5915	182.395
13	84.515	2491.72	688.995	9.41479	37.3588	112.637
15	86.5276	2542.34	753.642	8.87491	28.7428	149.835
17	85.7963	2521.26	754.075	9.25225	32.699	129.124
19	82.6389	2603.76	659.098	8.72183	31.2084	82.3699
21	80.1605	2604.57	601.999	8.45617	29.1856	62.1823
23	81.5944	2661.78	678.201	9.18799	28.7506	84.0583
25	83.9186	2649.04	757.209	9.67745	28.8703	120.046
27	83.1295	2575.47	690.632	9.29411	30.2712	101.562
29	82.9984	2613.57	697.407	9.2375	28.1672	104.946
31	82.5362	2572.53	721.473	9.98562	34.1664	93.0273
33	81.8722	2616.94	680.799	9.26863	27.5483	86.3555
35	81.9469	2548.64	683.366	9.19801	27.36	112.952
37	81.7337	2578.22	688.062	10.3992	38.8174	94.2679
39	82.4992	2579.56	716.211	9.73133	31.8632	119.547

## Sheet: N10
depth	Porosity	Al	Fe tot	Mn tot	P tot	S tot
cm	%	μmol/g	μmol/g	μmol/g	μmol/g	μmol/g
0.5	91.6458	2275.51	689.475	19.6926	47.177	38.3646
1.5	92.7754	2237.27	742.387	15.5406	52.4688	45.0594
2.5	90.2969	2185.54	712.435	14.2839	51.036	39.1633
3.5	89.1304	2278.07	732.77	11.9152	58.4041	33.1555
4.5	87.7473	2368.06	578.407	8.305	37.0391	55.5771
5.5	87.5803	2391.33	548.427	7.67856	31.5713	72.5813
6.5	87.7009	2426.29	556.08	7.27511	29.4292	99.0429
7.5	86.6949	2363.58	504.672	7.1395	27.4892	91.6966
8.5	88.0178	2472.07	619.637	7.64862	27.9589	111.404
9.5	87.3549	2504.99	638.595	8.22746	29.0427	114.542
11	83.074	2391.02	608.691	7.50792	27.7775	88.2411
13	85.6579	2584.32	711.448	8.41276	30.0517	130.579
15	83.5313	2423.72	559.351	7.53012	28.3483	89.5412
17	76.87	2363.05	427.76	7.49172	31.6943	42.4538
19	76.7257	2453.21	443.402	7.30423	28.7244	24.7479
21	79.4203	2487.41	491.884	7.3228	26.6159	49.2275
23	79.6031	2610.33	541.161	8.06254	28.0981	39.3803
25	81.4566	2566.67	560.79	8.02832	27.4708	77.1689
27	81.1097	2575.35	544.692	7.88992	26.8618	72.947
29		2590.57	636.327	8.43442	27.248	128.041
31		2518.31	683.476	8.55455	26.6804	177.211
33	83.6021	2512.95	562.54	8.05599	26.9639	88.818
35	82.1138	2511.68	509.179	7.50664	28.0248	60.3649
37	79.3846	2554.47	593.577	8.17394	26.9762	110.566
39	82.8335	2502.47	514.29	7.38815	27.2667	68.9234
41	80.8537	2532.04	553.675	7.93312	26.3147	67.3897
43	74.1188	2261.41	320.849	5.21479	21.2879	32.7379
45	72.7666	2283.39	287.903	5.32145	23.5388	19.046
47	73.5915	2250.01	290.375	4.77811	20.381	35.0391

## Sheet: N7
depth	Porosity	Al	Fe tot	Mn tot	P tot	S tot
cm	%	μmol/g	μmol/g	μmol/g	μmol/g	μmol/g
0.5	93.0158	2161.37	855.978	17.8099	64.6313	40.2997
1.5	93.0023	2124.99	911.336	12.481	73.133	44.6284
2.5	93.1032	2214.38	924.565	12.6228	74.394	67.6828
3.5	91.9448	2126.06	1030.94	13.3858	97.0843	37.5122
4.5	90.6565	2217.73	848.627	11.2017	70.8872	46.4425
5.5	89.0645	2284.9	753.353	9.39696	50.4539	74.0175
6.5	89.6366	2263.8	862.973	10.251	60.3464	82.2442
7.5	88.861	2316.34	796.993	9.20638	48.0206	81.1246
8.5		2396.71	588.276	7.89363	32.7078	65.5378
9.5	89.238	2503.82	754.713	8.49703	30.2115	156.658
11	90.1189	2492.21	830.761	9.78376	30.155	214.86
13		2523.24	835.2	12.2633	40.0213	162.758
15	85.6749
17	86.9344	2569.32	784.576	11.1644	33.2792	167.989
19		2480.83	747.72	13.3061	39.8315	160.87
21	89.5384	2417.02	915.167	13.6581	34.9461	379.405
23	87.26	2560.94	738.061	12.6109	38.0781	146.294
25		2477.42	823.252	12.6523	34.629	228.705
27	84.2812	2356.99	538.374	9.57862	30.4788	73.9373
29	86.6738	2489.94	720.545	12.1122	34.701	143.149
31	87.4638	2551.9	793.505	13.2153	37.1311	198.869
33	86.894	2554.83	768.123	12.2973	32.1231	164.091
35	87.25	2480.92	883.965	12.1821	29.1913	336.288
37	87.3611	2424.41	878.446	12.4165	32.1424	351.889
39	85.9968	2517.05	804.934	11.7915	29.0886	245.678
41	85.7331	2537.32	785.335	11.6644	28.8222	240.559
43	88.1578	2442.14	802.139	12.1992	30.2496	273.556
45	85.9849	2475.95	809.821	14.9205	42.4004	242.756
47	85.0153	2598.77	721.605	12.0505	28.9369	134.791
49	83.4813	2596.82	702.052	11.897	28.5559	118.375
51	86.1218	2556.45	894.329	13.3494	29.7879	267.177
53	86.1811	2527.44	778.898	13.066	29.2555	154.512
55		2591.79	787.933	15.9858	38.748	102.329
57	85.2773	2628.01	733.588	13.1432	32.9095	79.7072

## Sheet: NB8
depth	Porosity	Al	Fe tot	Mn tot	P tot	S tot
cm	%	μmol/g	μmol/g	μmol/g	μmol/g	μmol/g
0.5	92.6403	2224.11	781.346	12.7132	60.8759	46.359
1.5	92.2396	2246.75	793.251	11.3098	66.2808	45.3388
2.5	93.3365	2276.76	909.721	12.7338	73.8248	56.4628
3.5	93.3269	2176.86	938.692	12.9419	79.2274	55.1246
4.5	93.2894	2112.78	905.923	12.3894	78.8387	57.0778
5.5	92.3936	2155.39	858.347	11.5168	70.707	67.7829
6.5	92.0134	2217.78	812.194	10.2272	60.7748	88.3437
7.5	91.3762	2259.21	790.629	10.0164	59.3046	82.136
8.5	91.3486	2253.38	790.642	9.54112	53.7176	117.41
9.5	91.1082	2276.69	772.921	9.03091	49.7062	134.66
11	90.9287	2227.16	711.626	8.28752	42.0098	121.154
13	90.8761	2402.52	715.375	8.56402	32.9844	197.593
15	91.0733	2420.43	724.035	10.2619	30.9931	240.663
17	90.8823	2369.41	724.918	11.0517	30.5976	291.841
19	92.7229	2256.53	812.841	12.4225	30.6321	416.652
21	93.8798	2136.06	1068.91	13.1749	30.165	775
23	90.2934	2298.69	946.712	14.6702	34.1231	577
25	91.841	2288.71	965.214	24.8218	74.6481	330.698
27	92.1915	2403.39	950.812	13.8605	34.7278	353.706
29	91.5426	2285.43	985.543	13.3487	34.5067	424.193
31	89.8595	2522.8	860.867	15.4505	40.1078	149.036
33	89.726	2563.35	898.321	21.1078	58.4703	121.759
35.5	88.7778	2640.4	890.48	21.509	63.4174	77.5113
38.5	89.1475	2630.88	915.304	15.6404	41.6782	173.674
41.5		2587.53	950.666	14.7088	35.6457	246.978
44.5	88.7766	2598.09	879.981	18.3212	49.0586	115.089
47.5	87.3773	2580.84	844.779	20.3968	59.0479	61.1495
50.5	87.7162	2608.58	866.344	18.8988	52.0278	101.609
53.5	88.3019	2567.67	932.913	24.5448	60.7012	125.407
56.5	88.042	2576.4	872.268	17.4155	43.0467	125.52
59.5	90.7864	2470.62	1092.34	16.2503	35.4052	471.781
62.5	88.2088	2604.73	893.917	20.9321	52.7068	115.185
65.5	87.5746	2573.1	881.878	21.758	57.126	104.92
68.5	88.6462	2584.26	915.647	19.8309	50.6389	168.72
71		2538.65	958.187	18.647	44.4463	239.568
