# Supplementary material for: Large variations in iron input to an oligotrophic Baltic Sea estuary: impact on sedimentary phosphorus burial
Source: Copernicus journal article supplement (doi:10.5194/bg-15-6979-2018), 2018-11-21

NB8

$\text{Fe}_{\text{ox}}$   
 $\mu\text{mol g}^{-1}$

$\text{Fe}_{\text{carb}}$   
 $\mu\text{mol g}^{-1}$

$\text{Fe}_{\text{mag}}$   
 $\mu\text{mol g}^{-1}$

$\text{S}^0$   
 $\mu\text{mol g}^{-1}$

CRS  
 $\mu\text{mol g}^{-1}$

Depth (cm)

0 100

0 150

0 30 60

0 100

0 40 100

10

30

50

70

◆ FeOx 1  
◆ FeOx 2

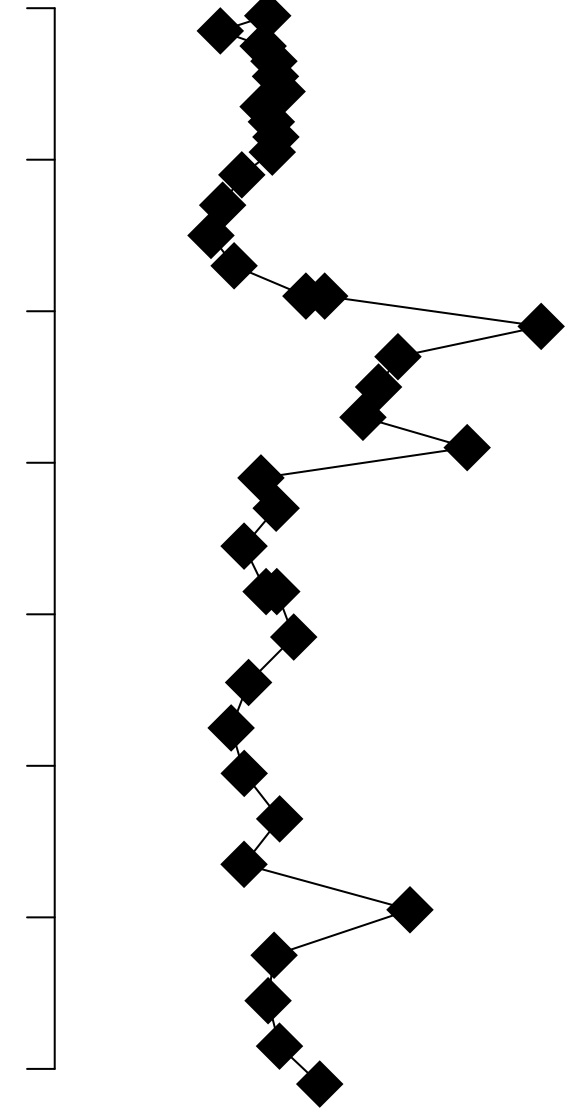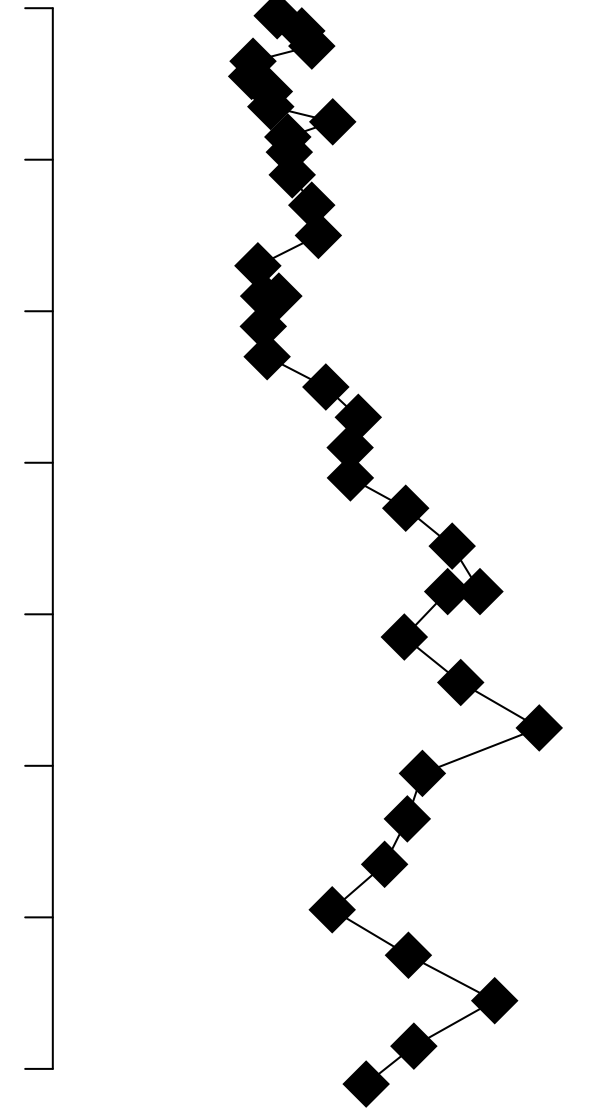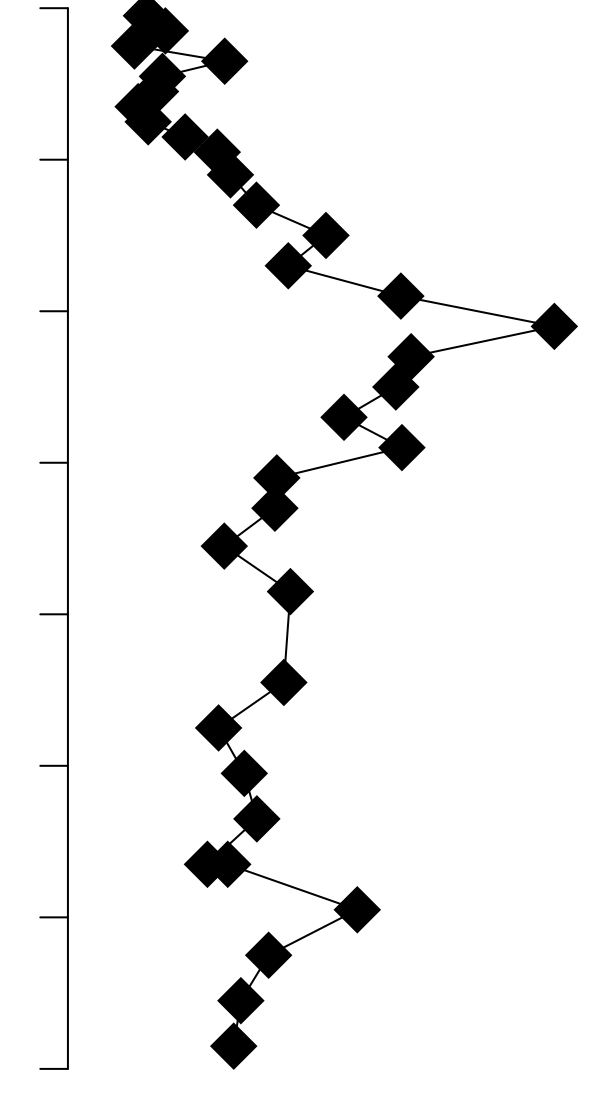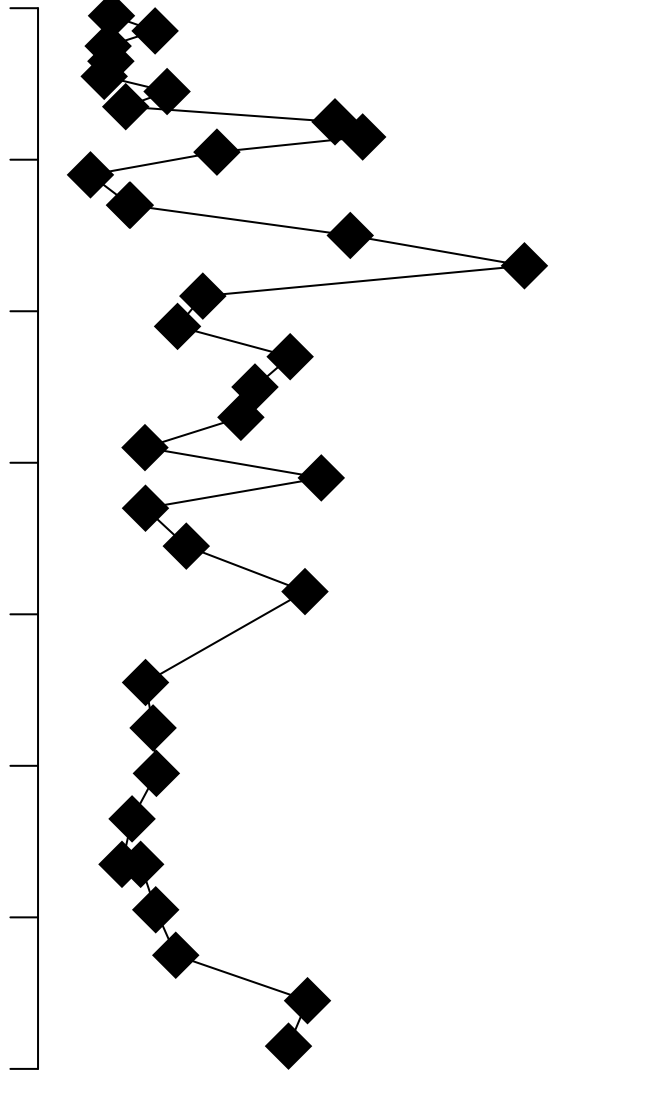

Supplement: Supplementary file 4 [file bg-15-6979-2018-supplement.zip]
