# Supplementary material for: Large variations in iron input to an oligotrophic Baltic Sea estuary: impact on sedimentary phosphorus burial
Source: Copernicus journal article supplement (doi:10.5194/bg-15-6979-2018), 2018-11-21
Supplement: Supplementary file 4 [file extractionNB8_overview.xlsx]

## Sheet: Sheet1
depth	Fe carb	Fe ox1	Fe ox2	Fe mag	AVS	elem. S	CRS	exch. P	FeP	authig. P	Detri. P	Org P
cm	μmol/g	μmol/g	μmol/g	μmol/g	μmol/g	μmol/g	μmol/g	μmol/g	μmol/g	μmol/g	μmol/g	μmol/g
0.5	98.3934	83.2107	38.4792	25.3968	39.3452	22.3118	10.2132	0.455558	43.3081	7.63091	9.64918	8.18435
1.5	74.1534	113.702	58.396	28.4674	37.7845	29.6176	18.6288	0.628923	47.7728	6.75376	9.24553	8.41532
2.5	96.0445	123.975	52.0877	29.7197	47.1598	17.7046	9.56657	0.896086	53.2657	8.53386	7.5778	8.7707
3.5	101.574	131.326	57.4794	22.3922	60.9539	52.4363	10.0998	1.22899	62.906	8.79931	7.31722	8.61636
4.5	102.357	98.2532	43.2672	22.2149	71.2542	28.4824	8.80836	1.25253	65.2651	8.17914	7.0151	8.08215
5.5	105.75	109.579	43.7134	24.4274	58.2749	25.8172	20.9384	0.934257	53.0198	6.86557	9.84029	7.06569
6.5	96.0265	74.5384	41.5021	24.6052	72.447	19.1192	12.9618	0.569868	41.2524	6.78891	9.37185	7.95047
7.5	100.257	67.3586	42.8443	32.3218	61.3597	22.9889	53.3245	0.759282	51.9017	6.5461	10.5773	7.30812
8.5	102.578	50.0088	35.016	26.7225	100.845	37.1987	58.6603	0.360383	32.5005	7.76468	9.57134	7.57108
9.5	100.726	50.4362	33.4177	26.9135	109.713	49.5887	30.553	0.194971	35.5906	7.3211	9.68989	7.15378
11	85.1432	48.6332	29.1202	27.2755	116.881	54.6571	6.15745	0.211812	23.4552	6.0398	11.0109	7.62954
13	75.3508	36.9401	26.1048	29.708	265	64.6479	13.8489	0.12913	4.97712	7.01463	9.76114	7.37238
15	69.3876	33.2514	21.3741	30.5355	333.356	91.4006	56.2701	0.116946	3.76714	6.68366	10.5402	7.86962
17	81.209	28.114	15.0863	22.9952	438.196	76.9075	89.8674	0.112551	3.36482	7.28937	9.99344	6.92206
19	122.702	34.6951	17.7785	24.6599	545.359	120.231	27.8325	0.0547427	4.09085	6.68314	9.15166	8.04496
21	238.158	46.9821	17.7321	23.6712	1032.52	179.282	22.9525	0.0988454	4.79338	6.44153	8.45749	8.45055
23	164.962	39.9144	18.559	24.1485	879.256	124.17	44.675	0.128839	11.5493	6.50237	9.0296	8.01088
25	155.048	73.734	27.2336	31.4633	416.299	118.285	37.8907	0.0915205	52.1213	8.02219	7.61987	8.60227
27	147.068	47.6549	29.3875	35.509	389.635	98.3423	35.1786	0.306999	11.2227	8.19355	8.96737	6.96878
29	200.346	54.9852	35.2696	34.4891	446.287	120.637	16.6733	0.0673591	12.1828	7.68971	8.94955	8.10469
31	94.9355	67.7515	29.5597	34.5246	190.34	72.4946	50.6804	0.0420764	14.1357	7.5849	9.43215	8.01045
33	102.704	55.3988	30.2805	41.4196	159.841	71.7617	16.774	0.147726	28.6213	7.78643	7.78605	8.27554
35.5	86.3055	55.2803	34.9838	47.2082	94.8838	52.2725	24.6394	0.149036	40.965	10.002	6.79714	7.68353
38.5	100.291	49.6428	34.1294	48.6559	188.943	77.7277	47.5353	0.119365	18.5493	9.37935	6.84303	8.07246
41.5	111.692	59.231	33.9799	41.2432				0	13.8457	8.75369	7.25935	6.49282
44.5	88.6017	54.1787	34.7981	48.2717	168.599	75.1989	16.7835	0.0622629	16.8419	8.76272	8.79014	7.94114
47.5	79.6864	50.7178	32.5609	58.0555	75.6261	50.0776	18.2362	0.06236	32.9279	8.00617	8.49004	6.84759
50.5	86.372	47.6188	35.2984	43.4968	118.721	59.9827	18.8758	0.0622913	28.7278	9.56977	7.82162	8.04022
53.5	104.486	49.0554	32.4575	41.6185	149.656	64.8043	14.1862	0.117269	34.9304	9.36278	8.20914	8.03943
56.5	86.296	41.8641	30.6368	38.7863	113.641	49.6993	14.0423	0.0997376	23.9176	9.81613	8.71929	7.70753
59.5	171.106	43.394	26.2493	32.2576	313.907	103.453	18.7486	0.0706804	12.551	8.76043	8.3981	7.90412
62.5	101.657	57.3604	33.1524	41.7539	131.017	69.341	22.61	0.0819958	30.398	9.3406	8.53902	6.6468
65.5	98.5689	53.9032	35.7587	52.5038	97.3377	58.6621	48.0243	0.0938544	37.5727	9.42744	9.03784	7.83309
68.5	104.401	52.5051	35.5701	42.431	146.371	55.9089	44.3569	0.0583705	27.4131	9.59138	7.7956	7.08006
71	124.98	76.4846	35.4395	36.4868				0	23.0361	9.53141	7.99577	6.02953
