# Supplementary material for: Large variations in iron input to an oligotrophic Baltic Sea estuary: impact on sedimentary phosphorus burial
Source: Copernicus journal article supplement (doi:10.5194/bg-15-6979-2018), 2018-11-21
Supplement: Supplementary file 7 [file bg-15-6979-2018-supplement.zip]

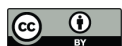

## *Supplement of*

# **Large variations in iron input to an oligotrophic Baltic Sea estuary: impact on sedimentary phosphorus burial**

**Wytze K. Lenstra et al.**

*Correspondence to:* Wytze K. Lenstra ([w.k.lenstra@uu.nl](mailto:w.k.lenstra@uu.nl))

- [bg-15-6979-2018-supplement-title-page.pdf](#)
- [Appendix\\_Ore.tex](#)
- [CH4\\_overview.xlsx](#)
- [Extractions\\_NB8.pdf](#)
- [Fe-oxides\\_scenario2.pdf](#)
- [Macrofauna\\_all\\_2.pdf](#)
- [Ore\\_estuary.bib](#)
- [PW\\_overview.xlsx](#)
- [Pb-210\\_fit.pdf](#)
- [Reaction\\_rates.pdf](#)
- [SP\\_overview.xlsx](#)
- [Sink\\_siwtch2.pdf](#)
- [Supplements\\_Ore\\_2.pdf](#)
- [extractionNB8\\_overview.xlsx](#)
- [irr+tur+por.pdf](#)
- [river\\_discharge\\_sweden.pdf](#)

The copyright of individual parts of the supplement might differ from the CC BY 4.0 License.
