# Supplementary figures and images for: Large variations in iron input to an oligotrophic Baltic Sea estuary: impact on sedimentary phosphorus burial
Source: Copernicus journal article supplement (doi:10.5194/bg-15-6979-2018), 2018-11-21

A

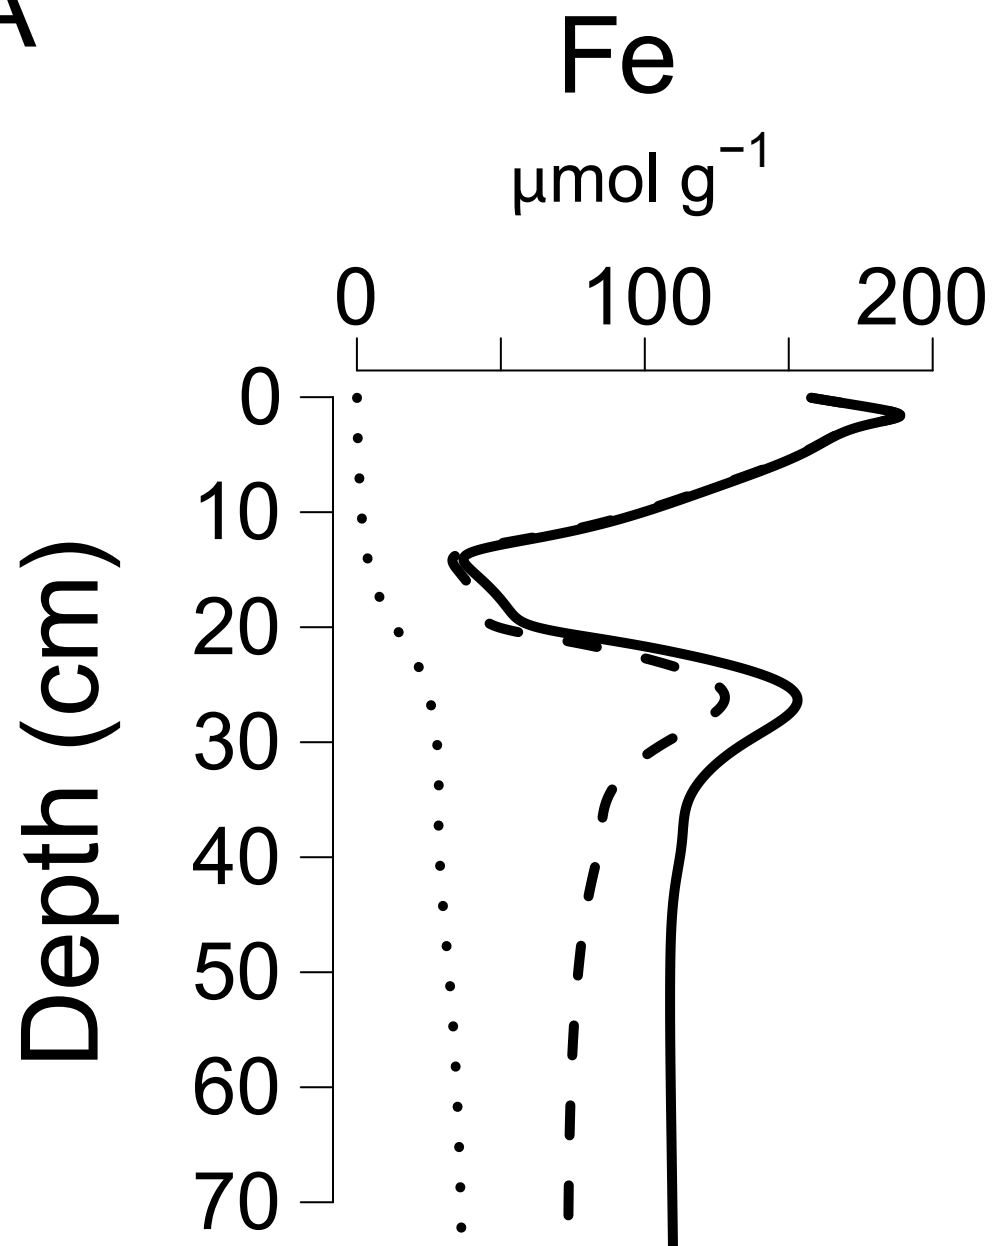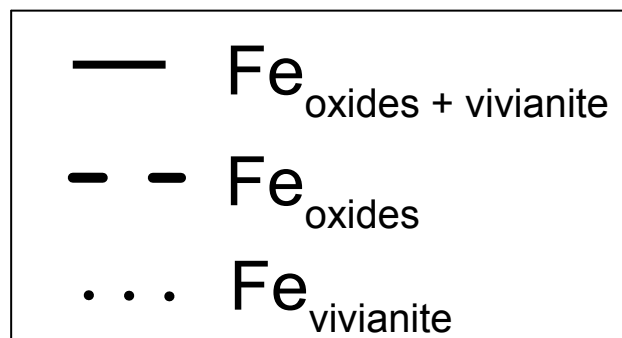

B

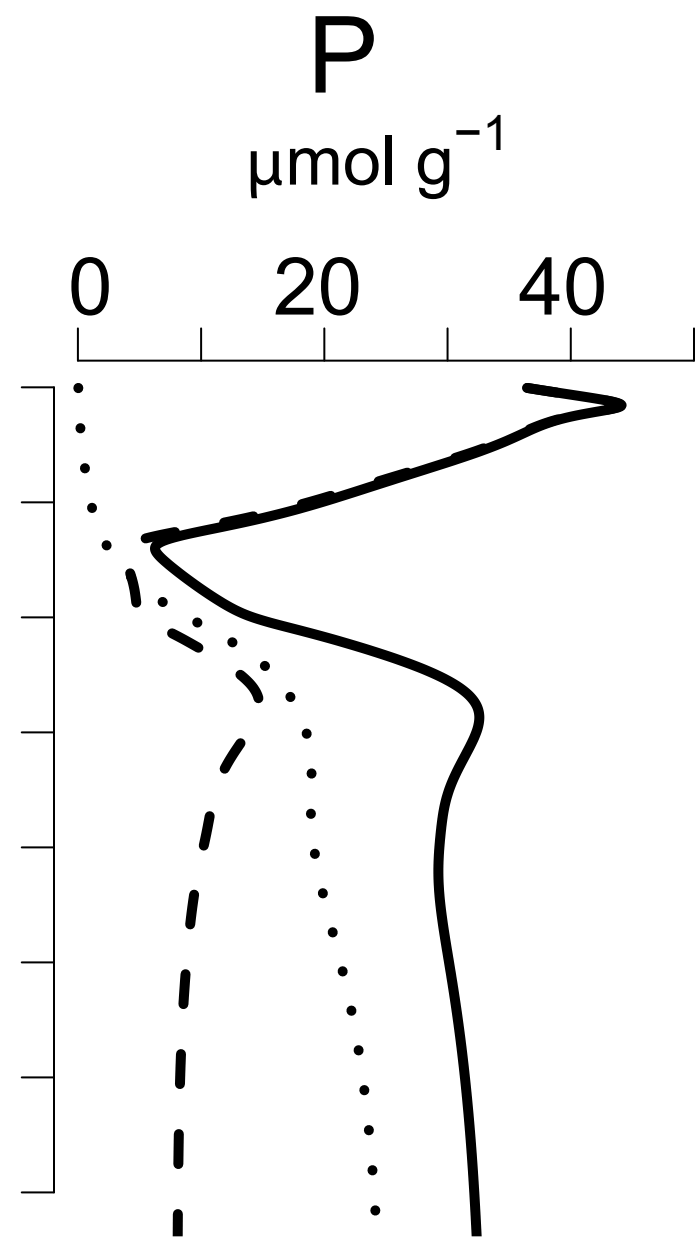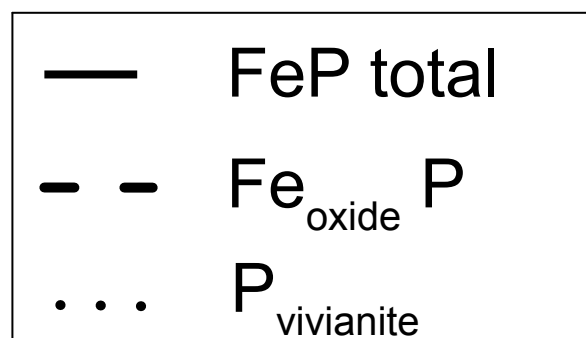

Supplement: Supplementary file 1 [file bg-15-6979-2018-supplement.zip]

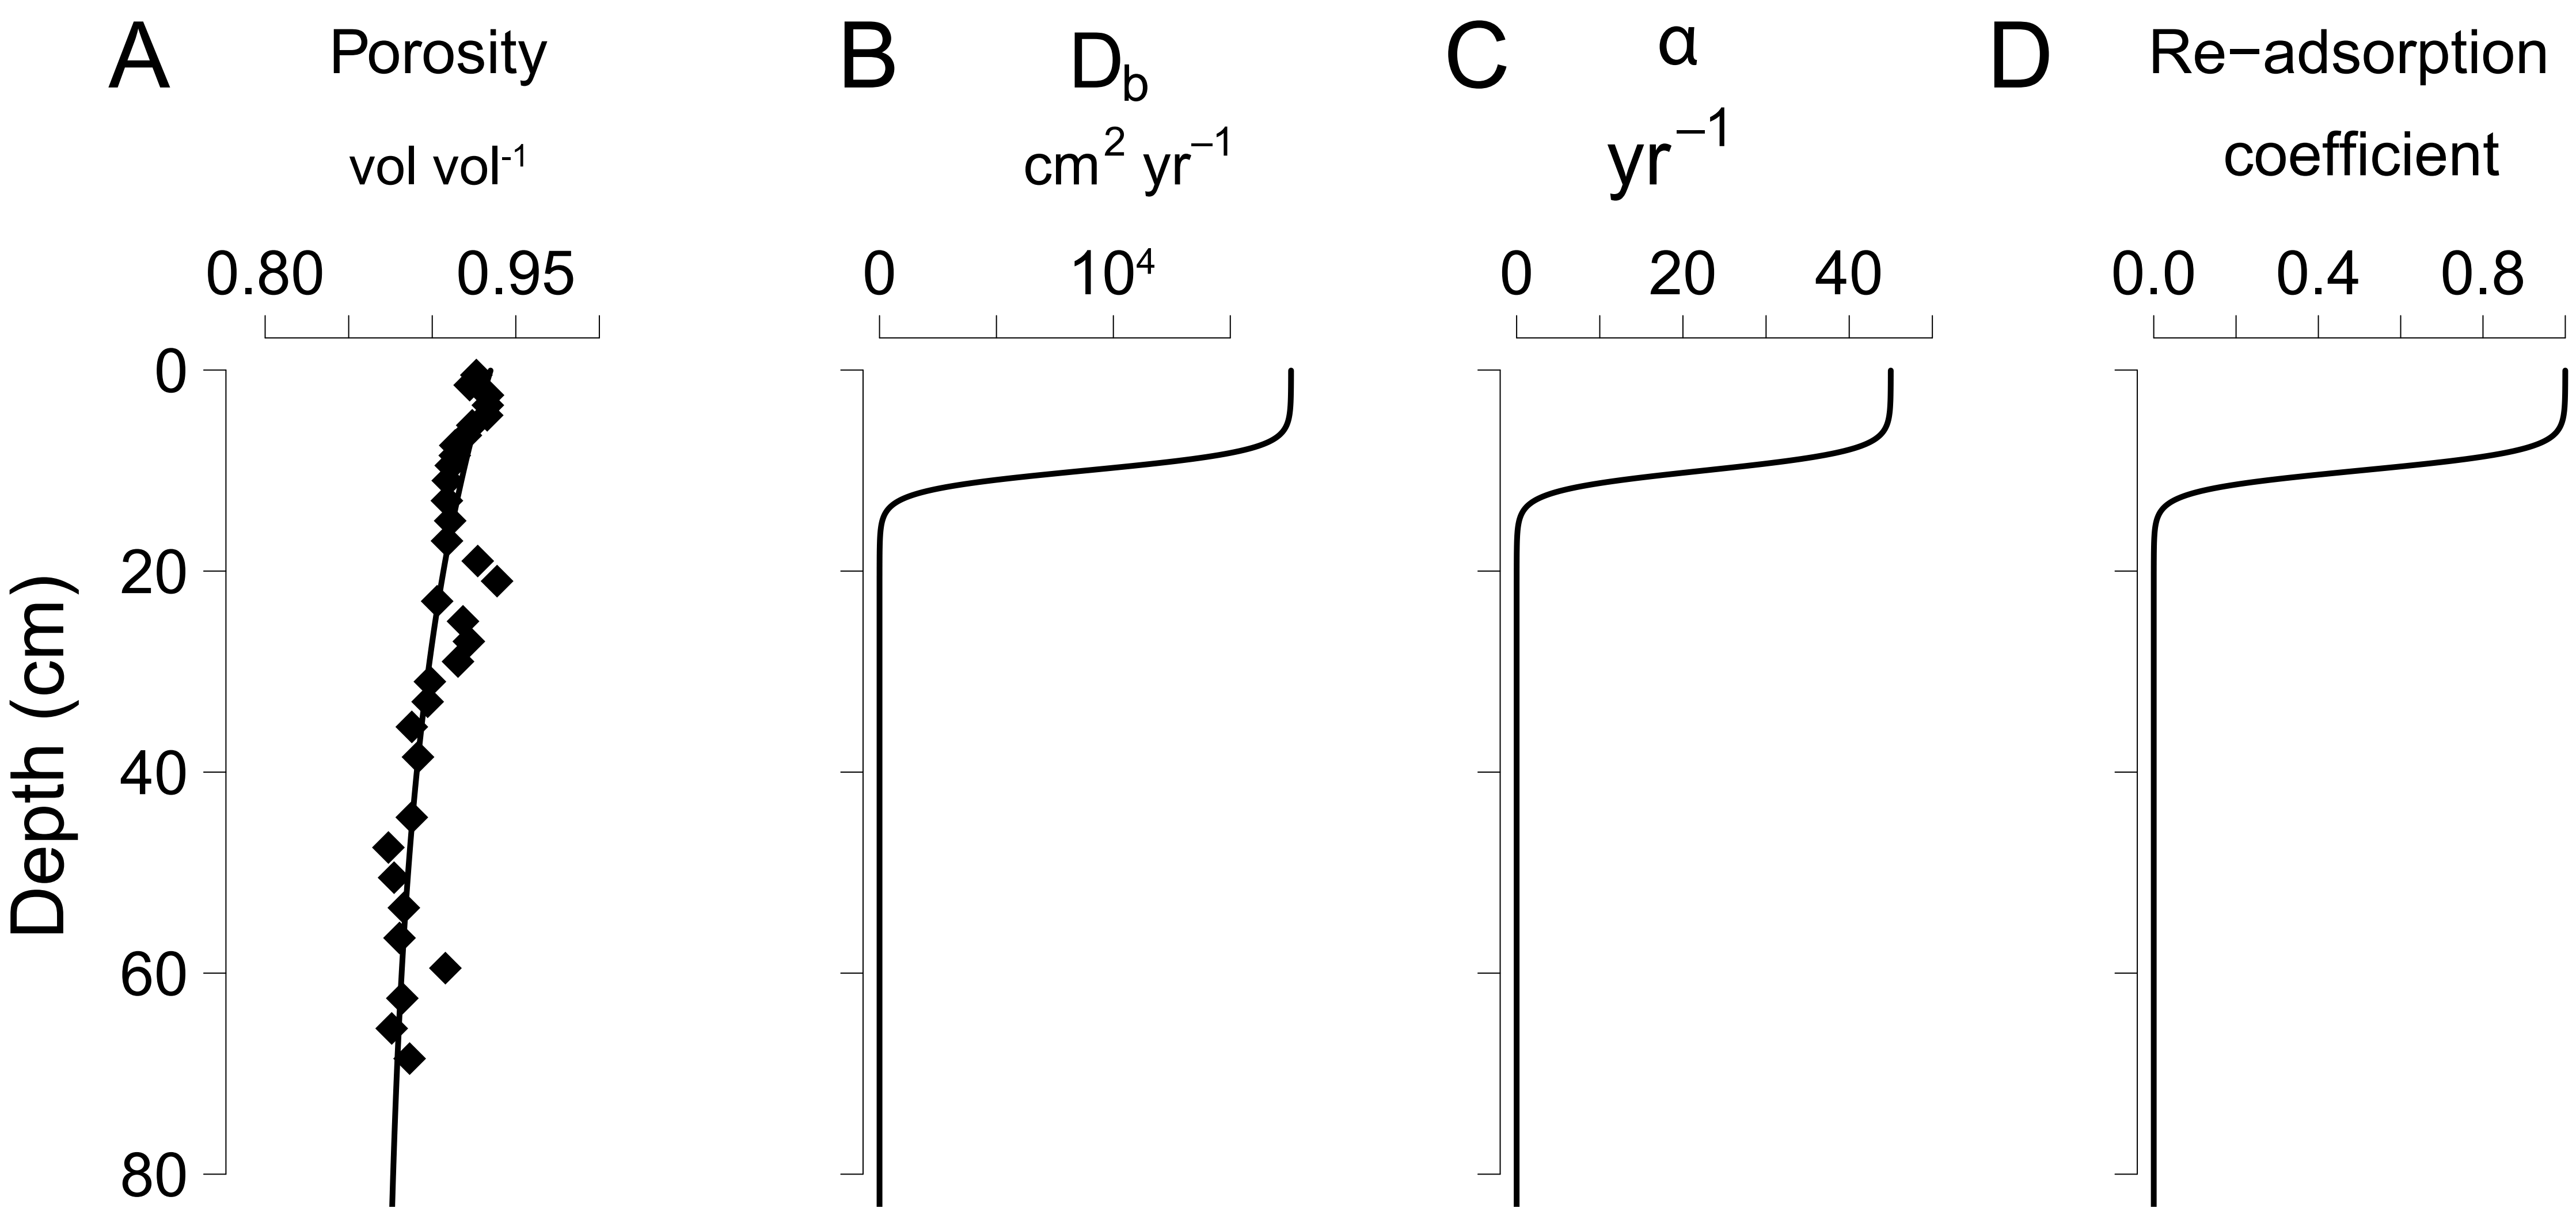

Supplement: Supplementary file 3 [file bg-15-6979-2018-supplement.zip]

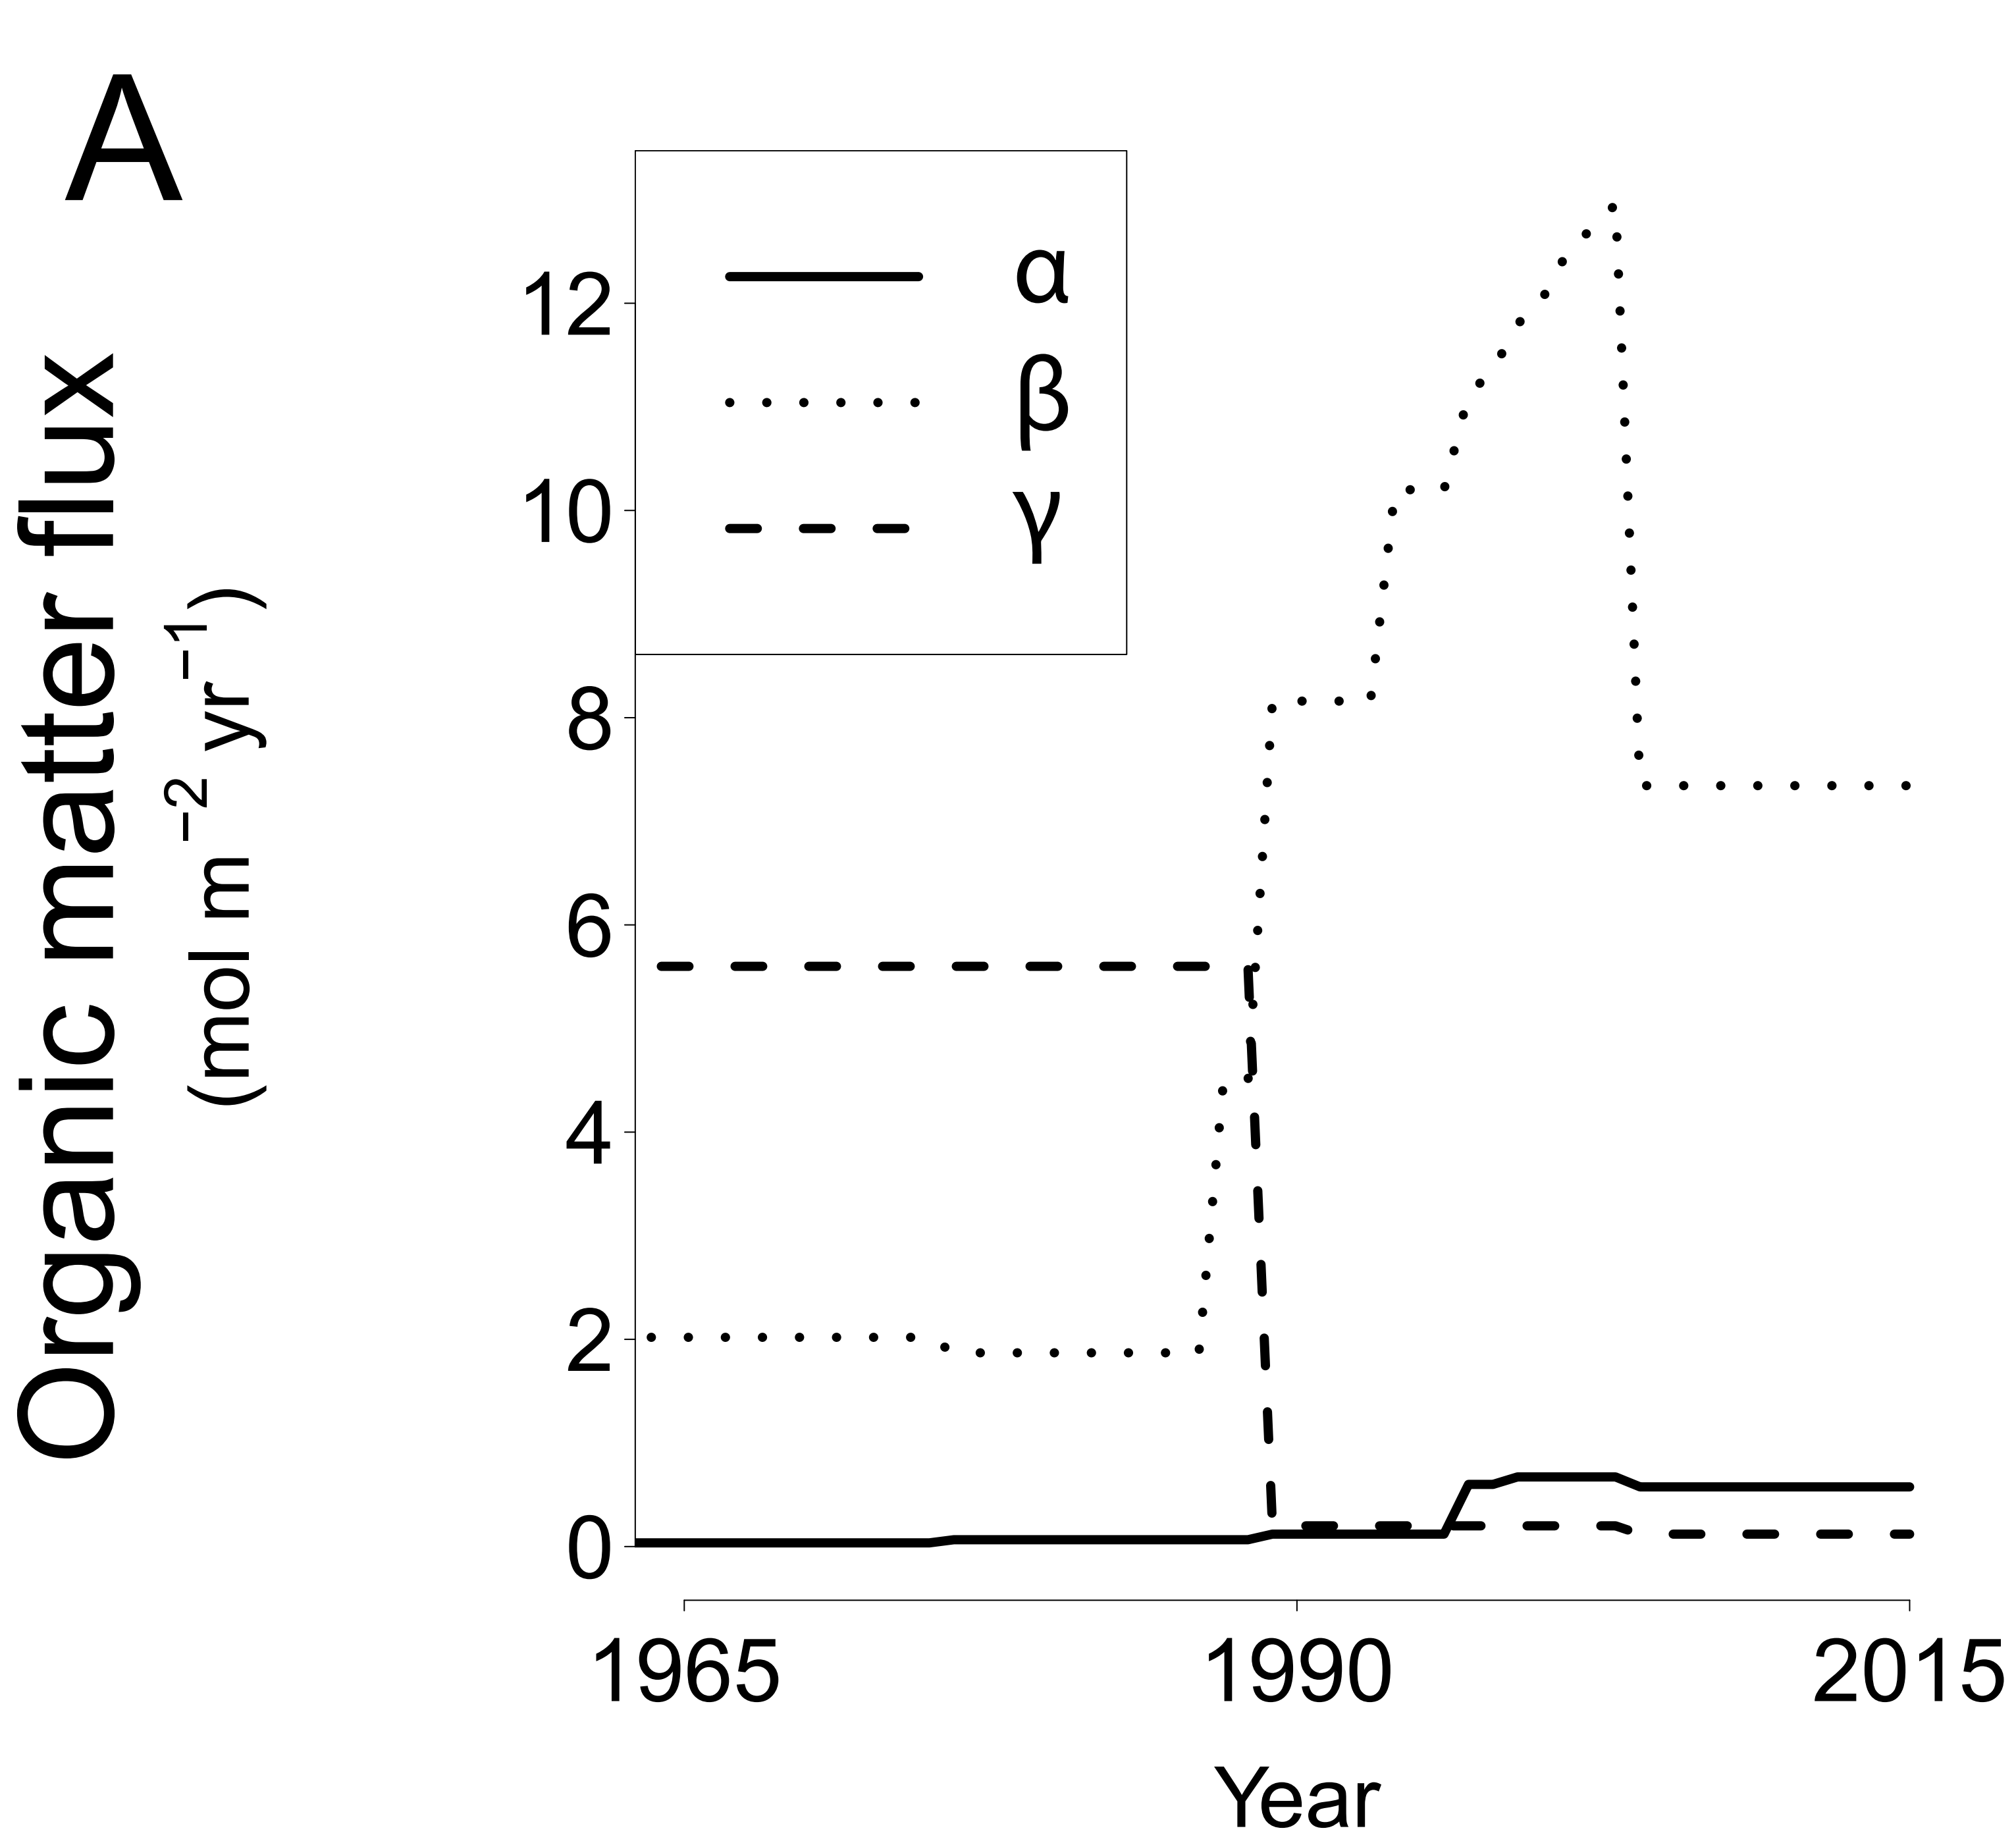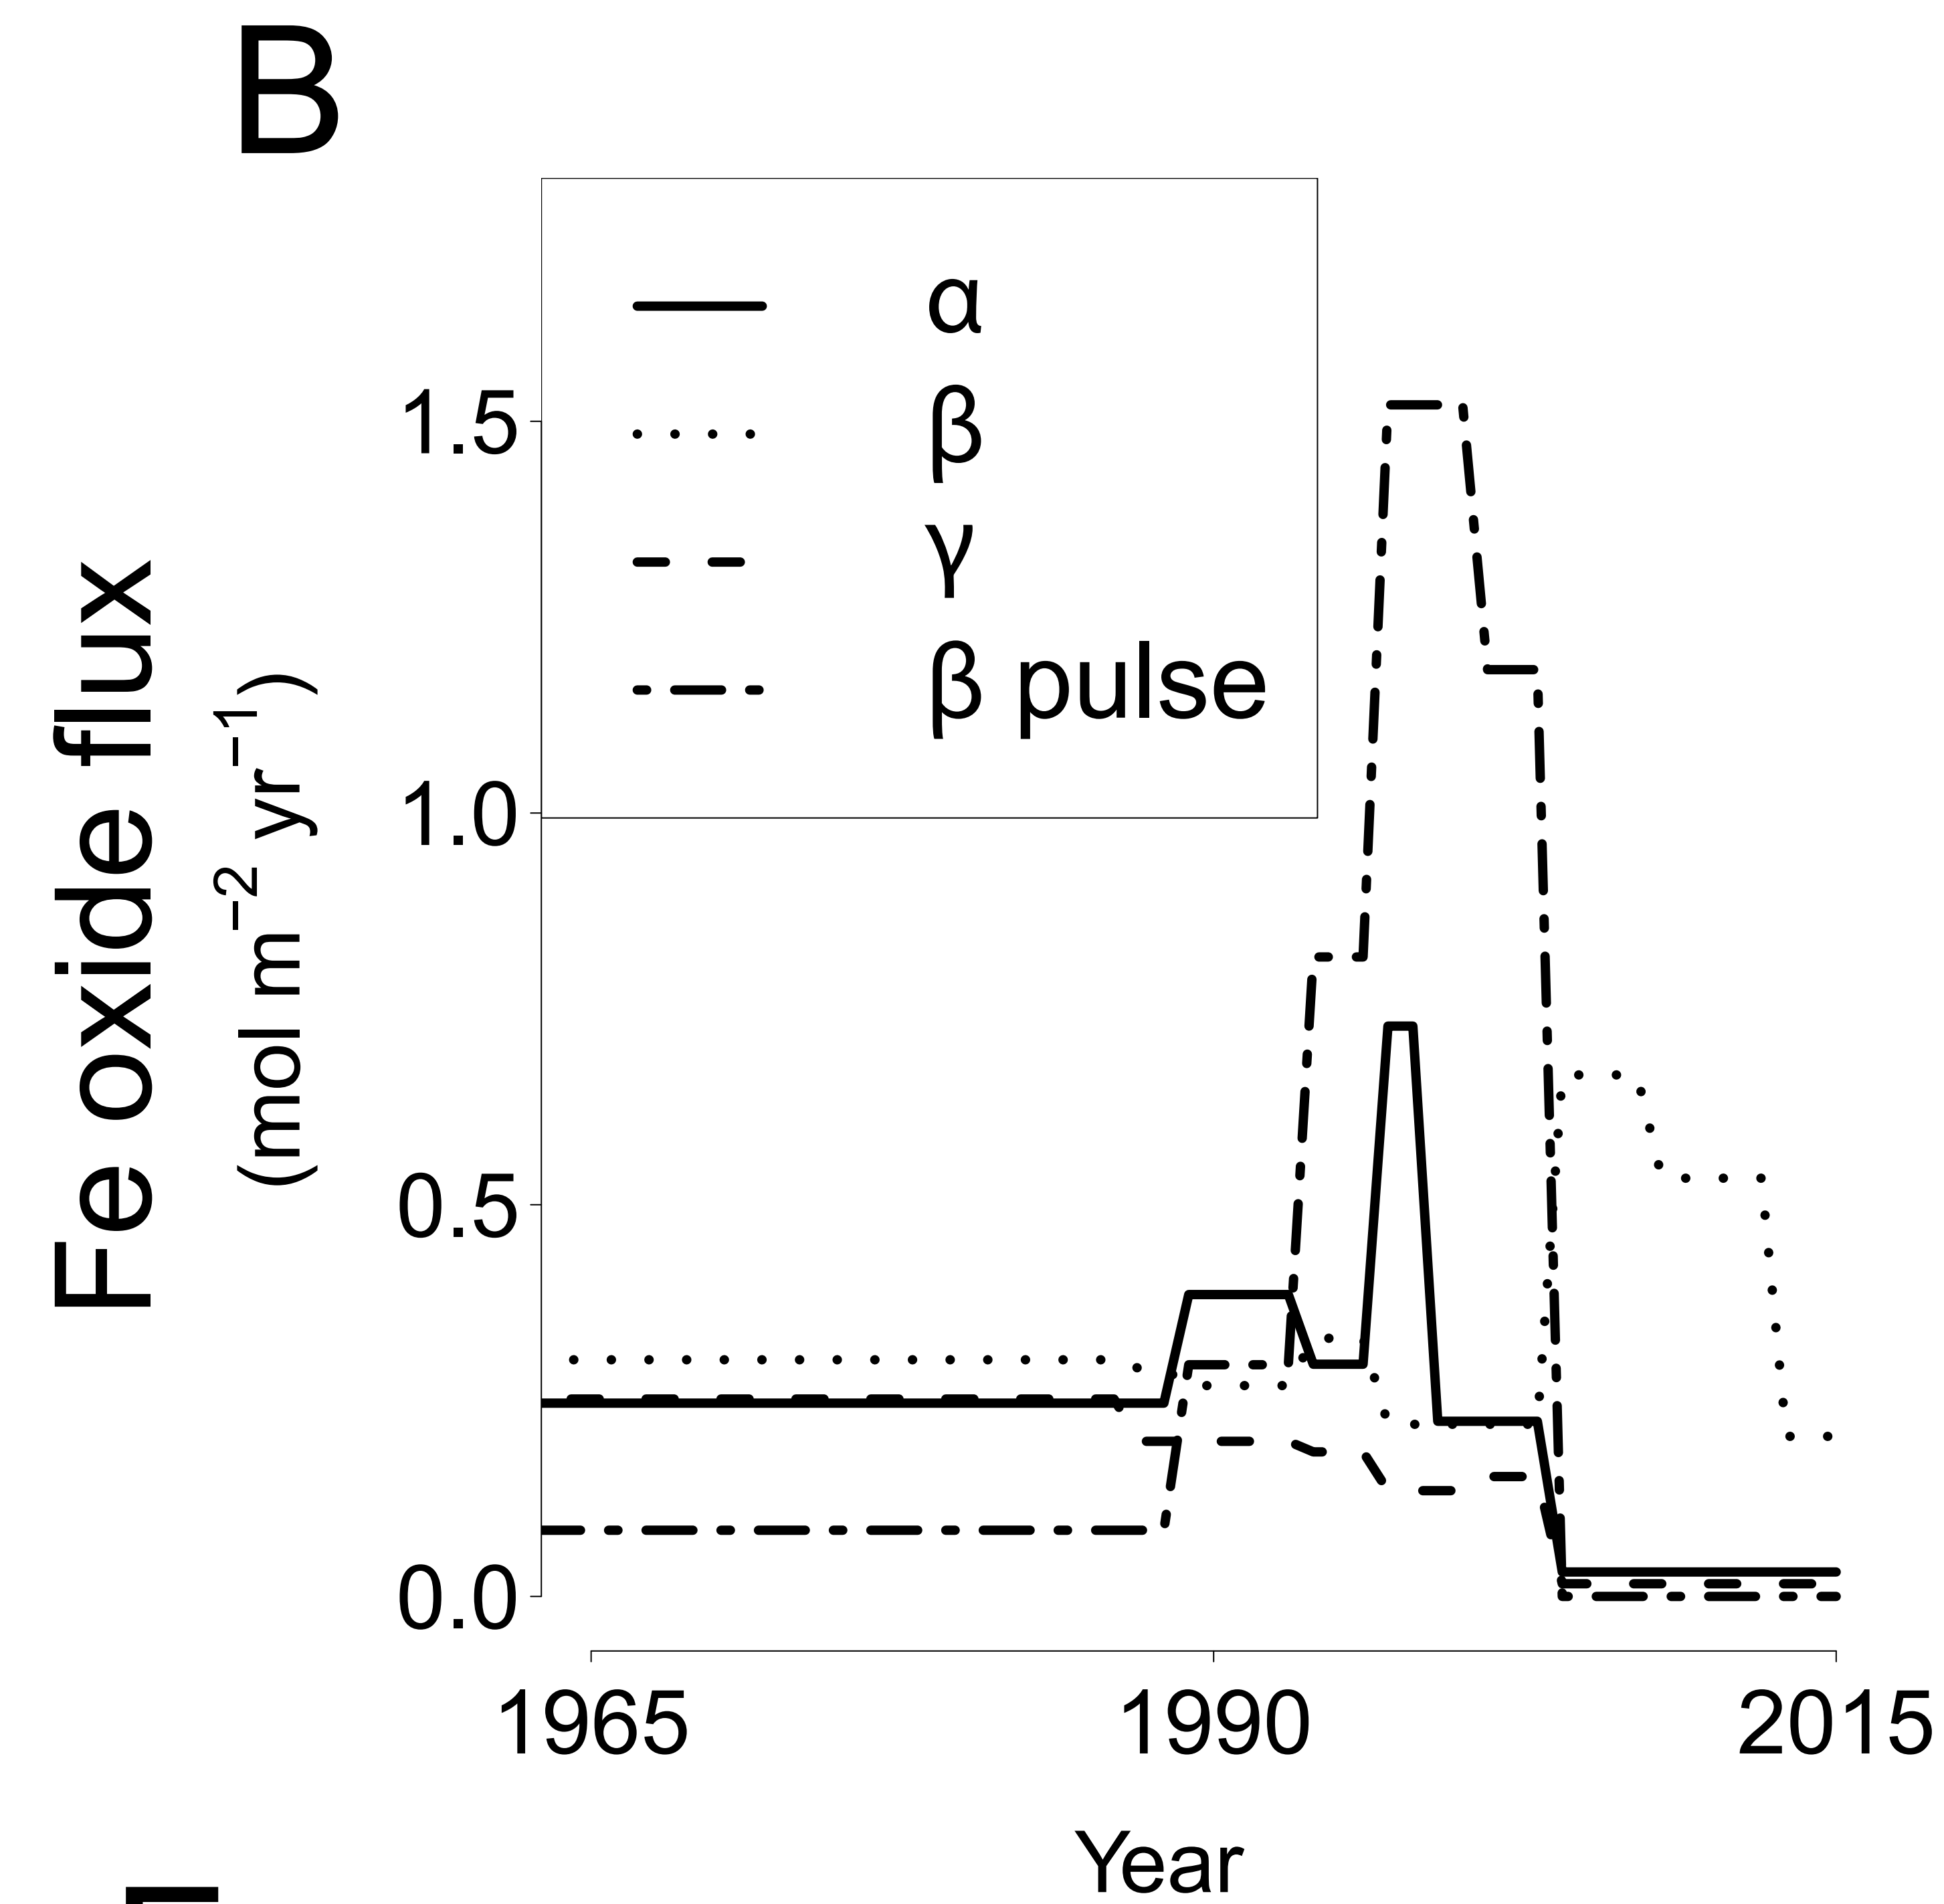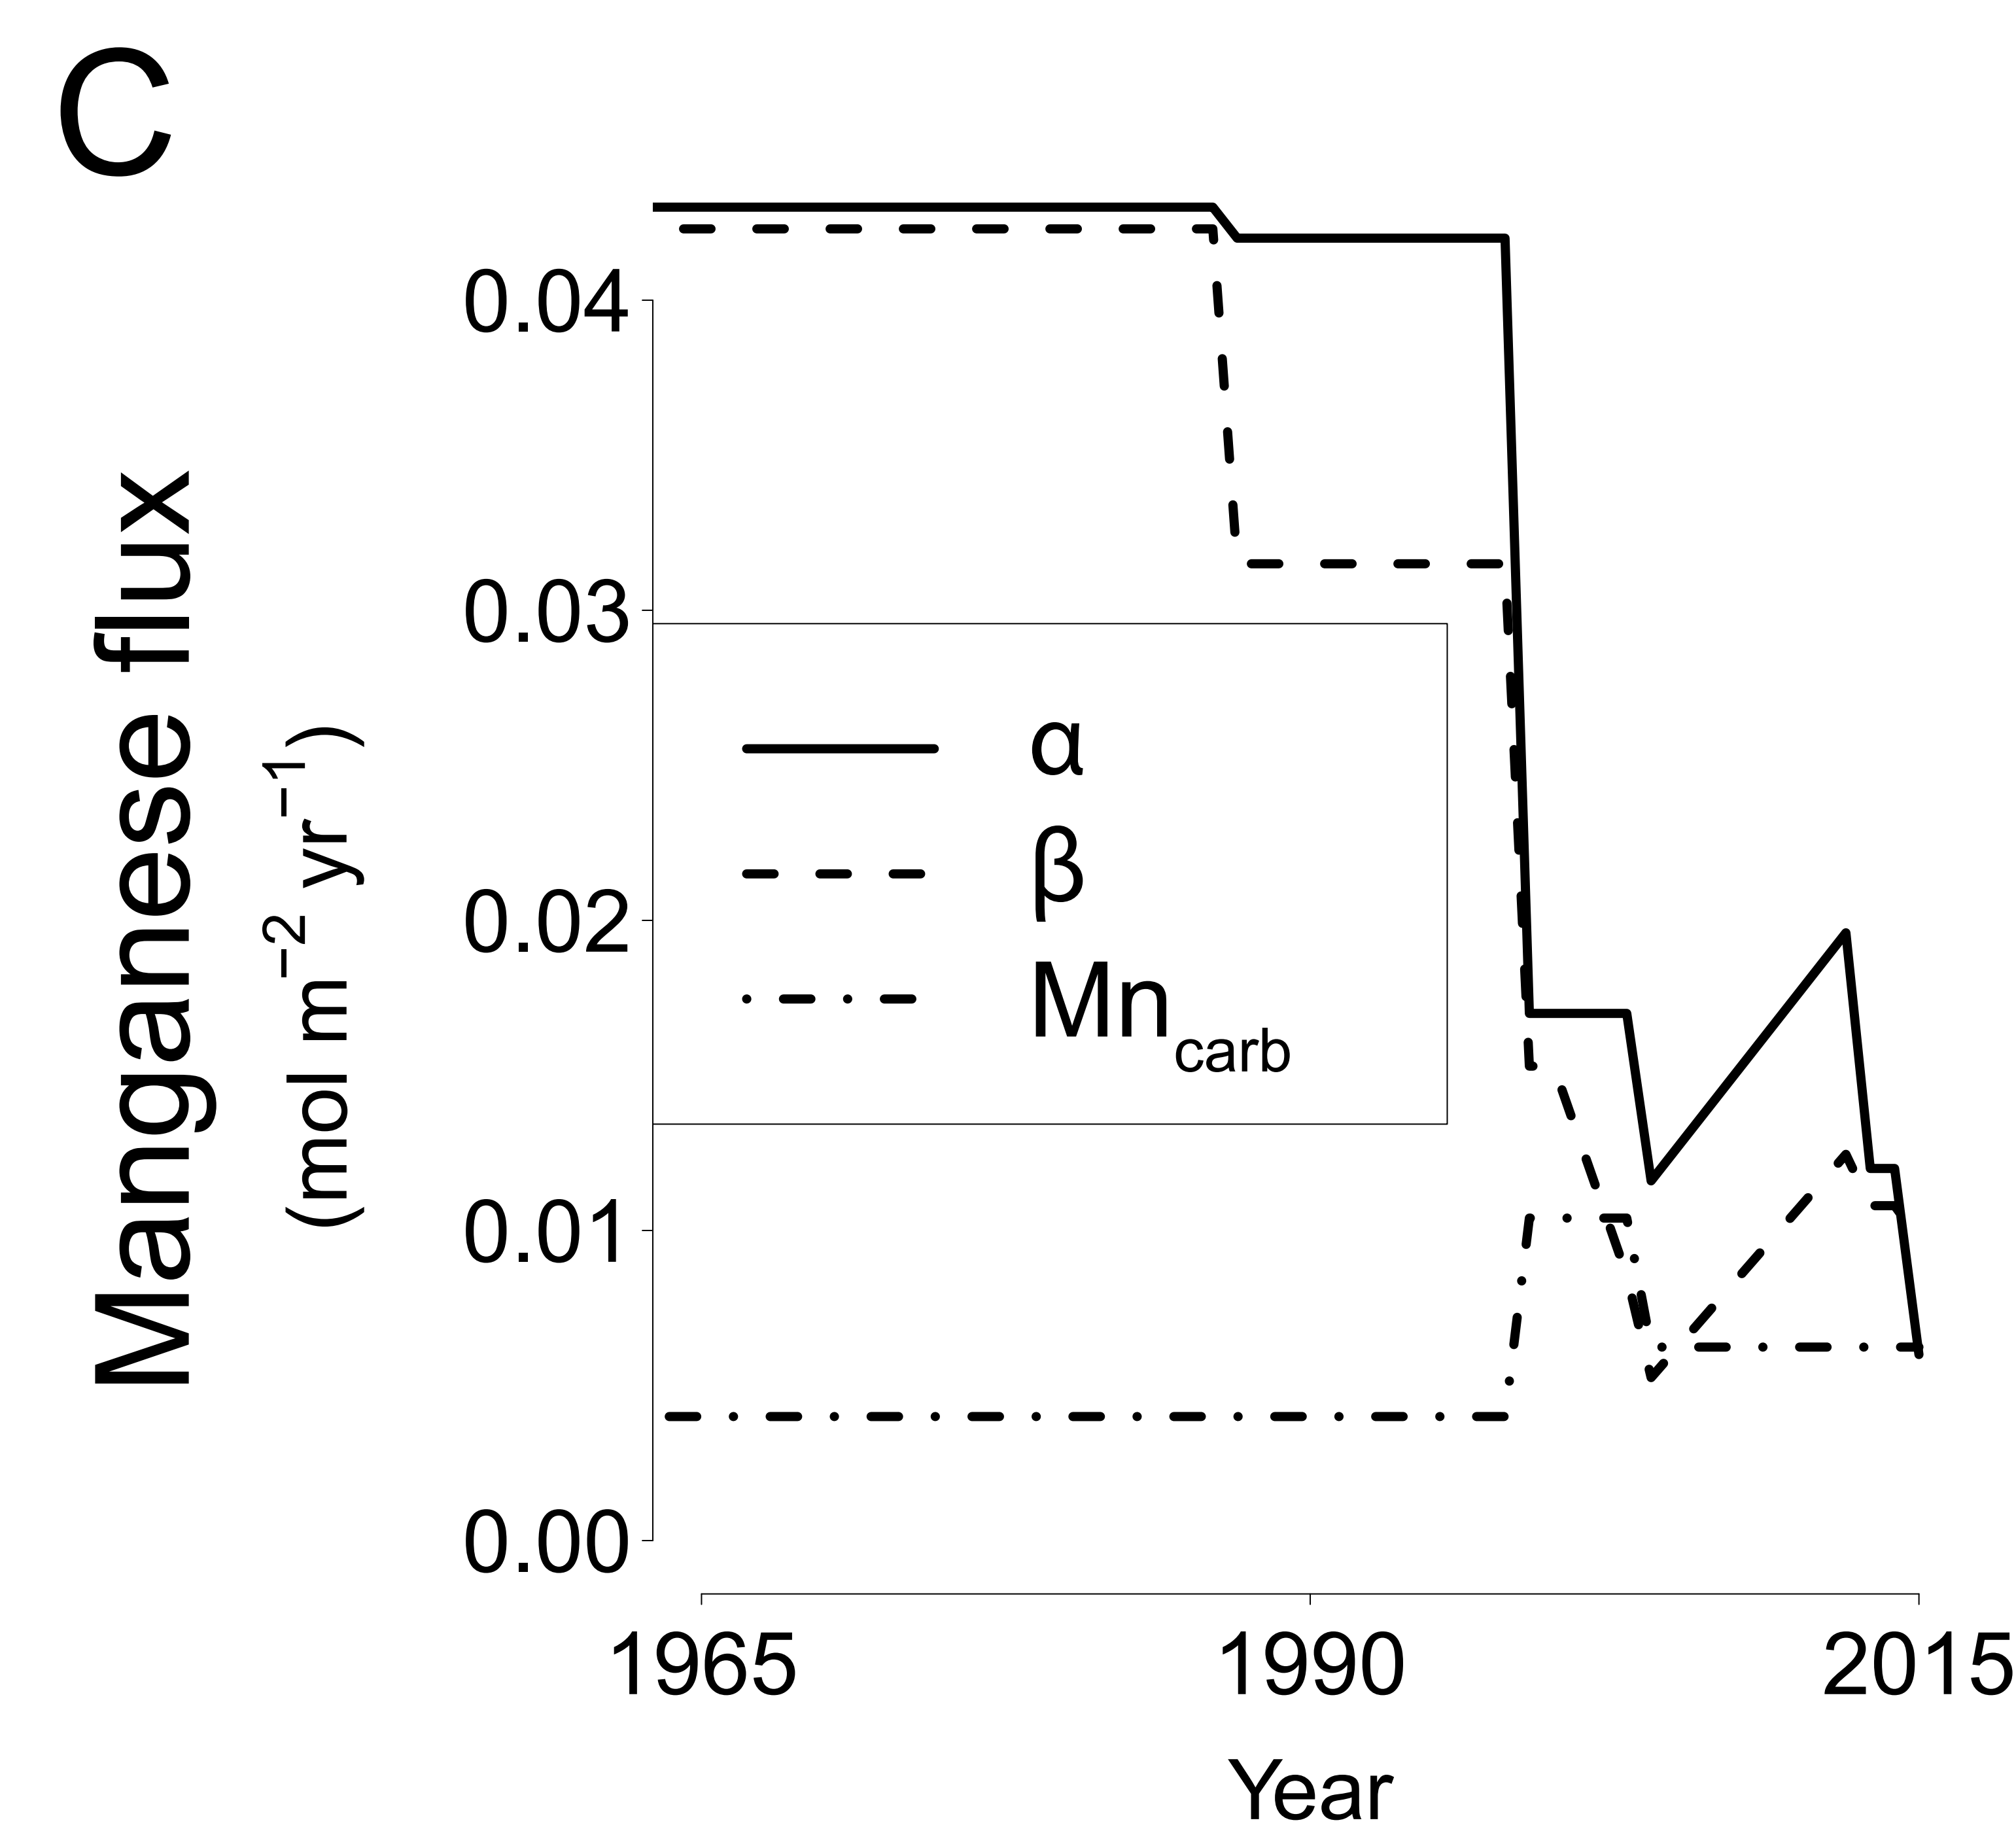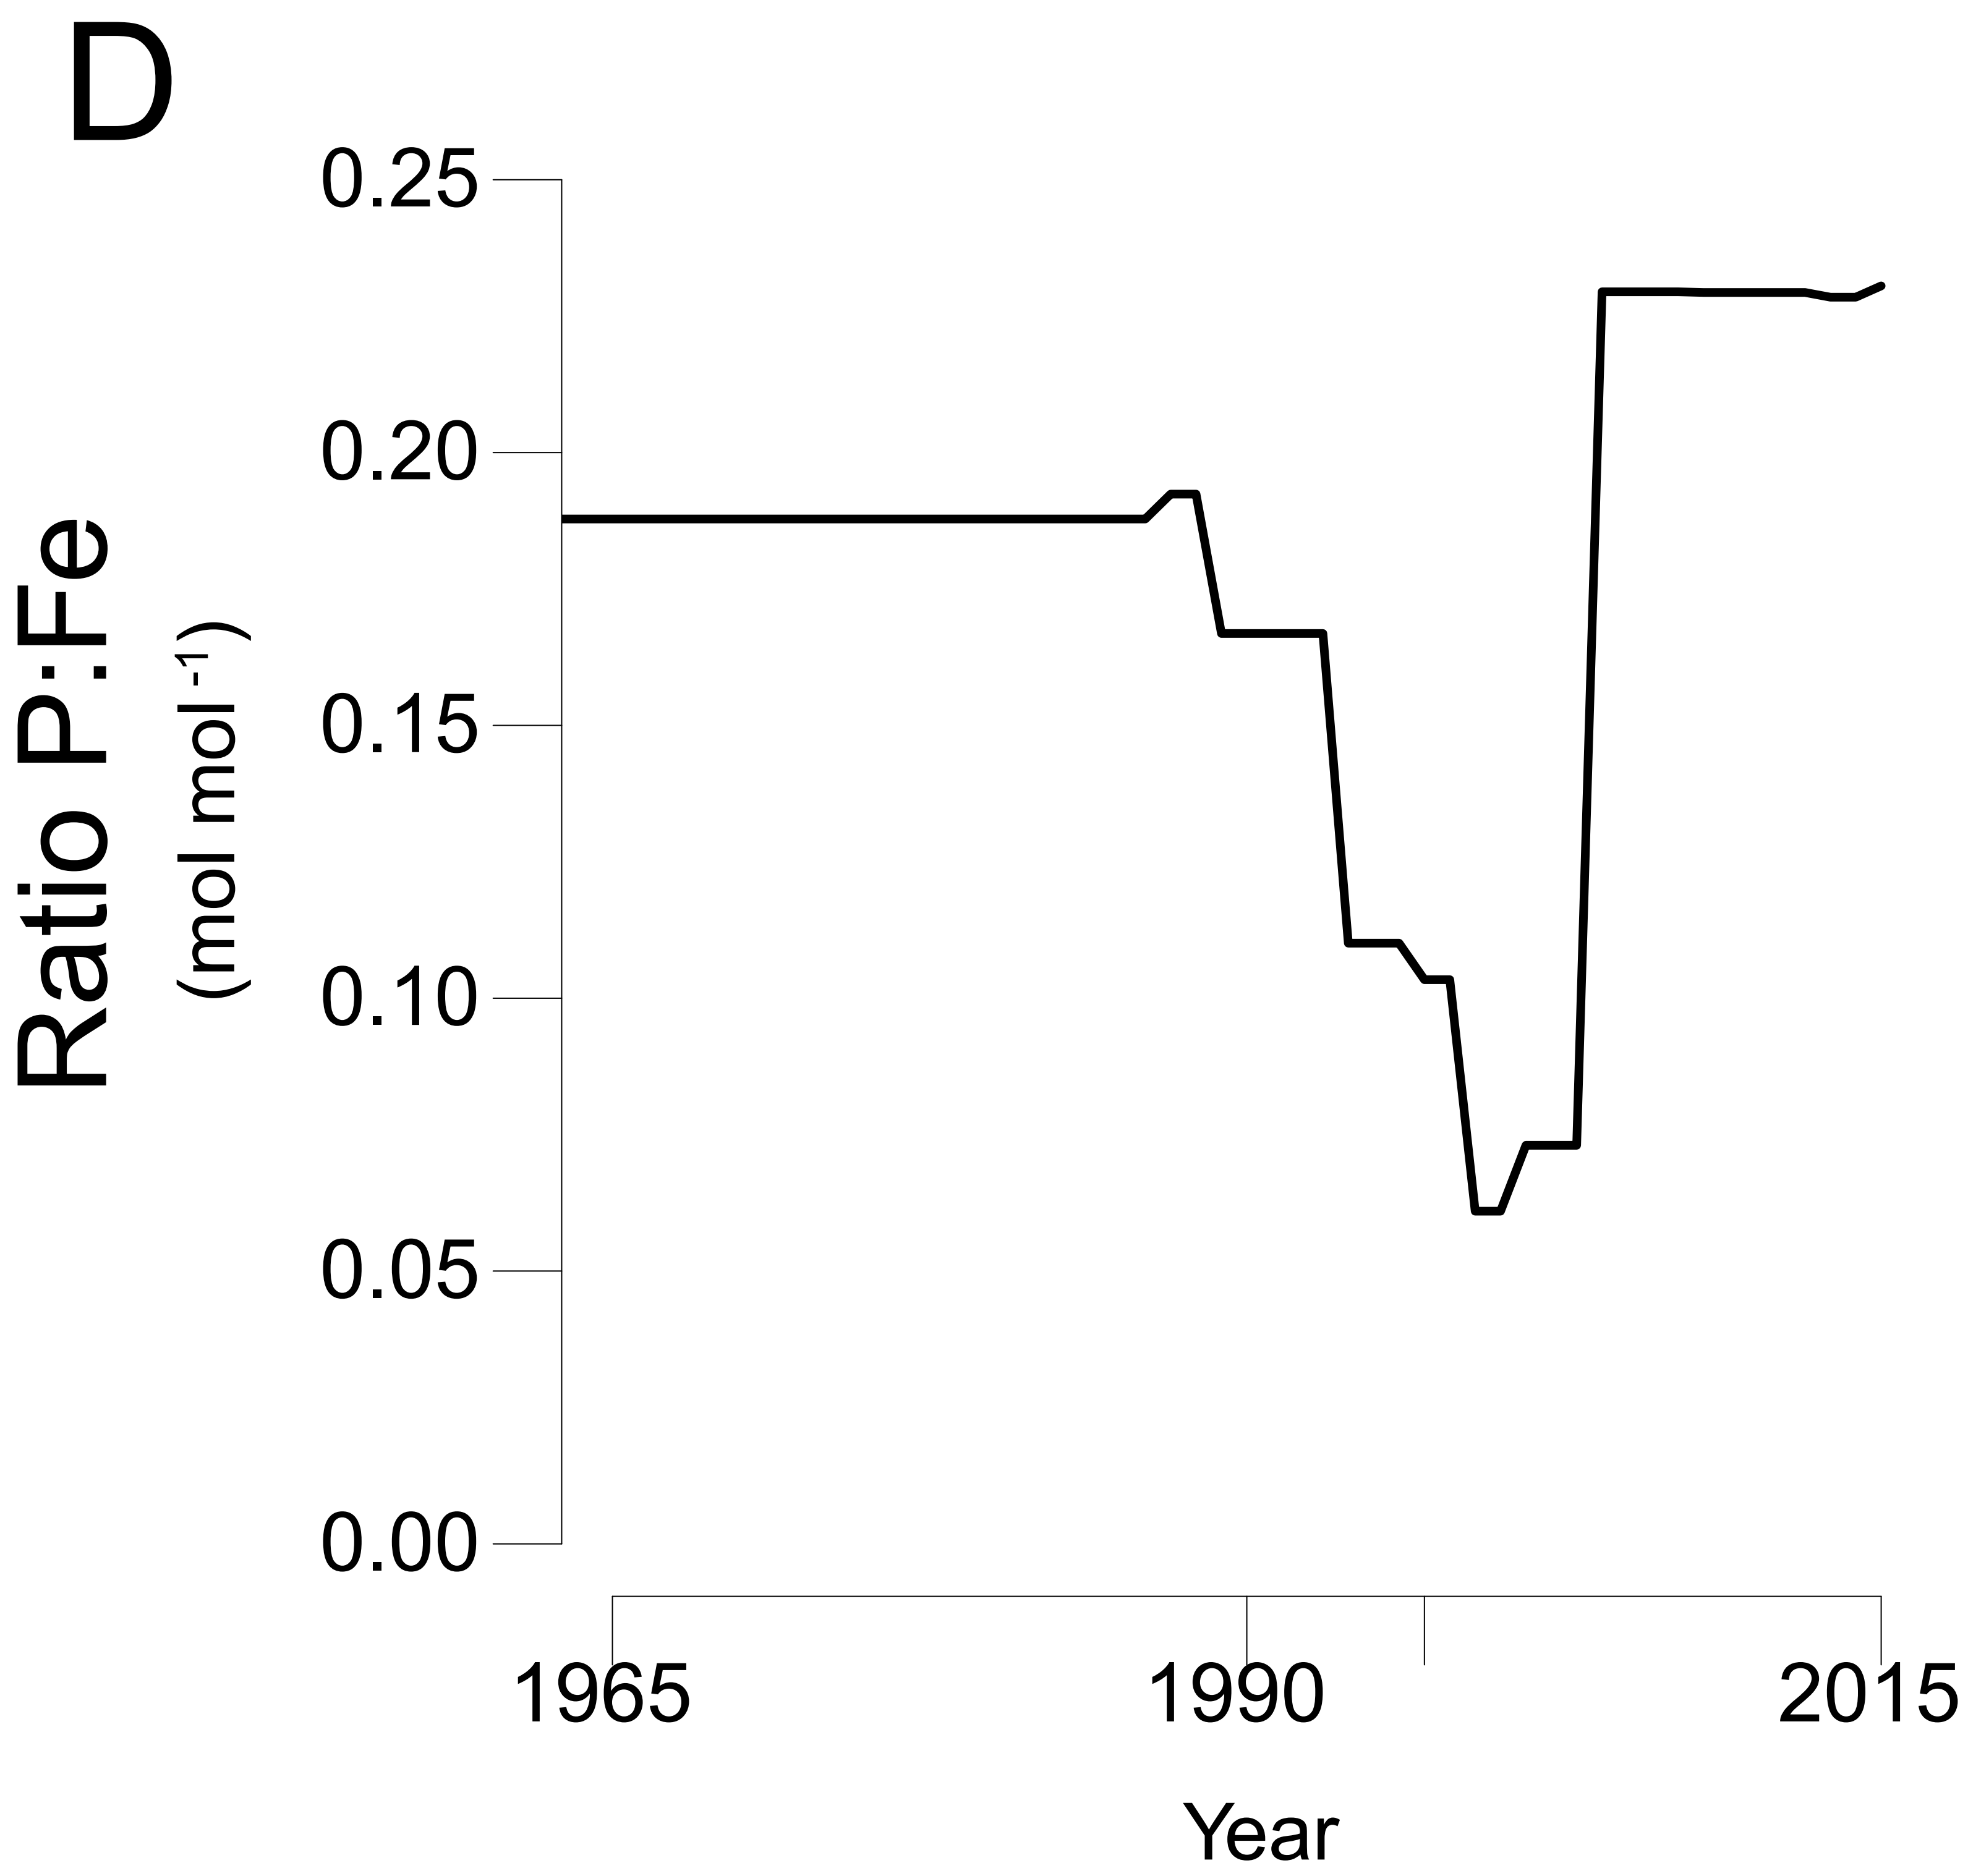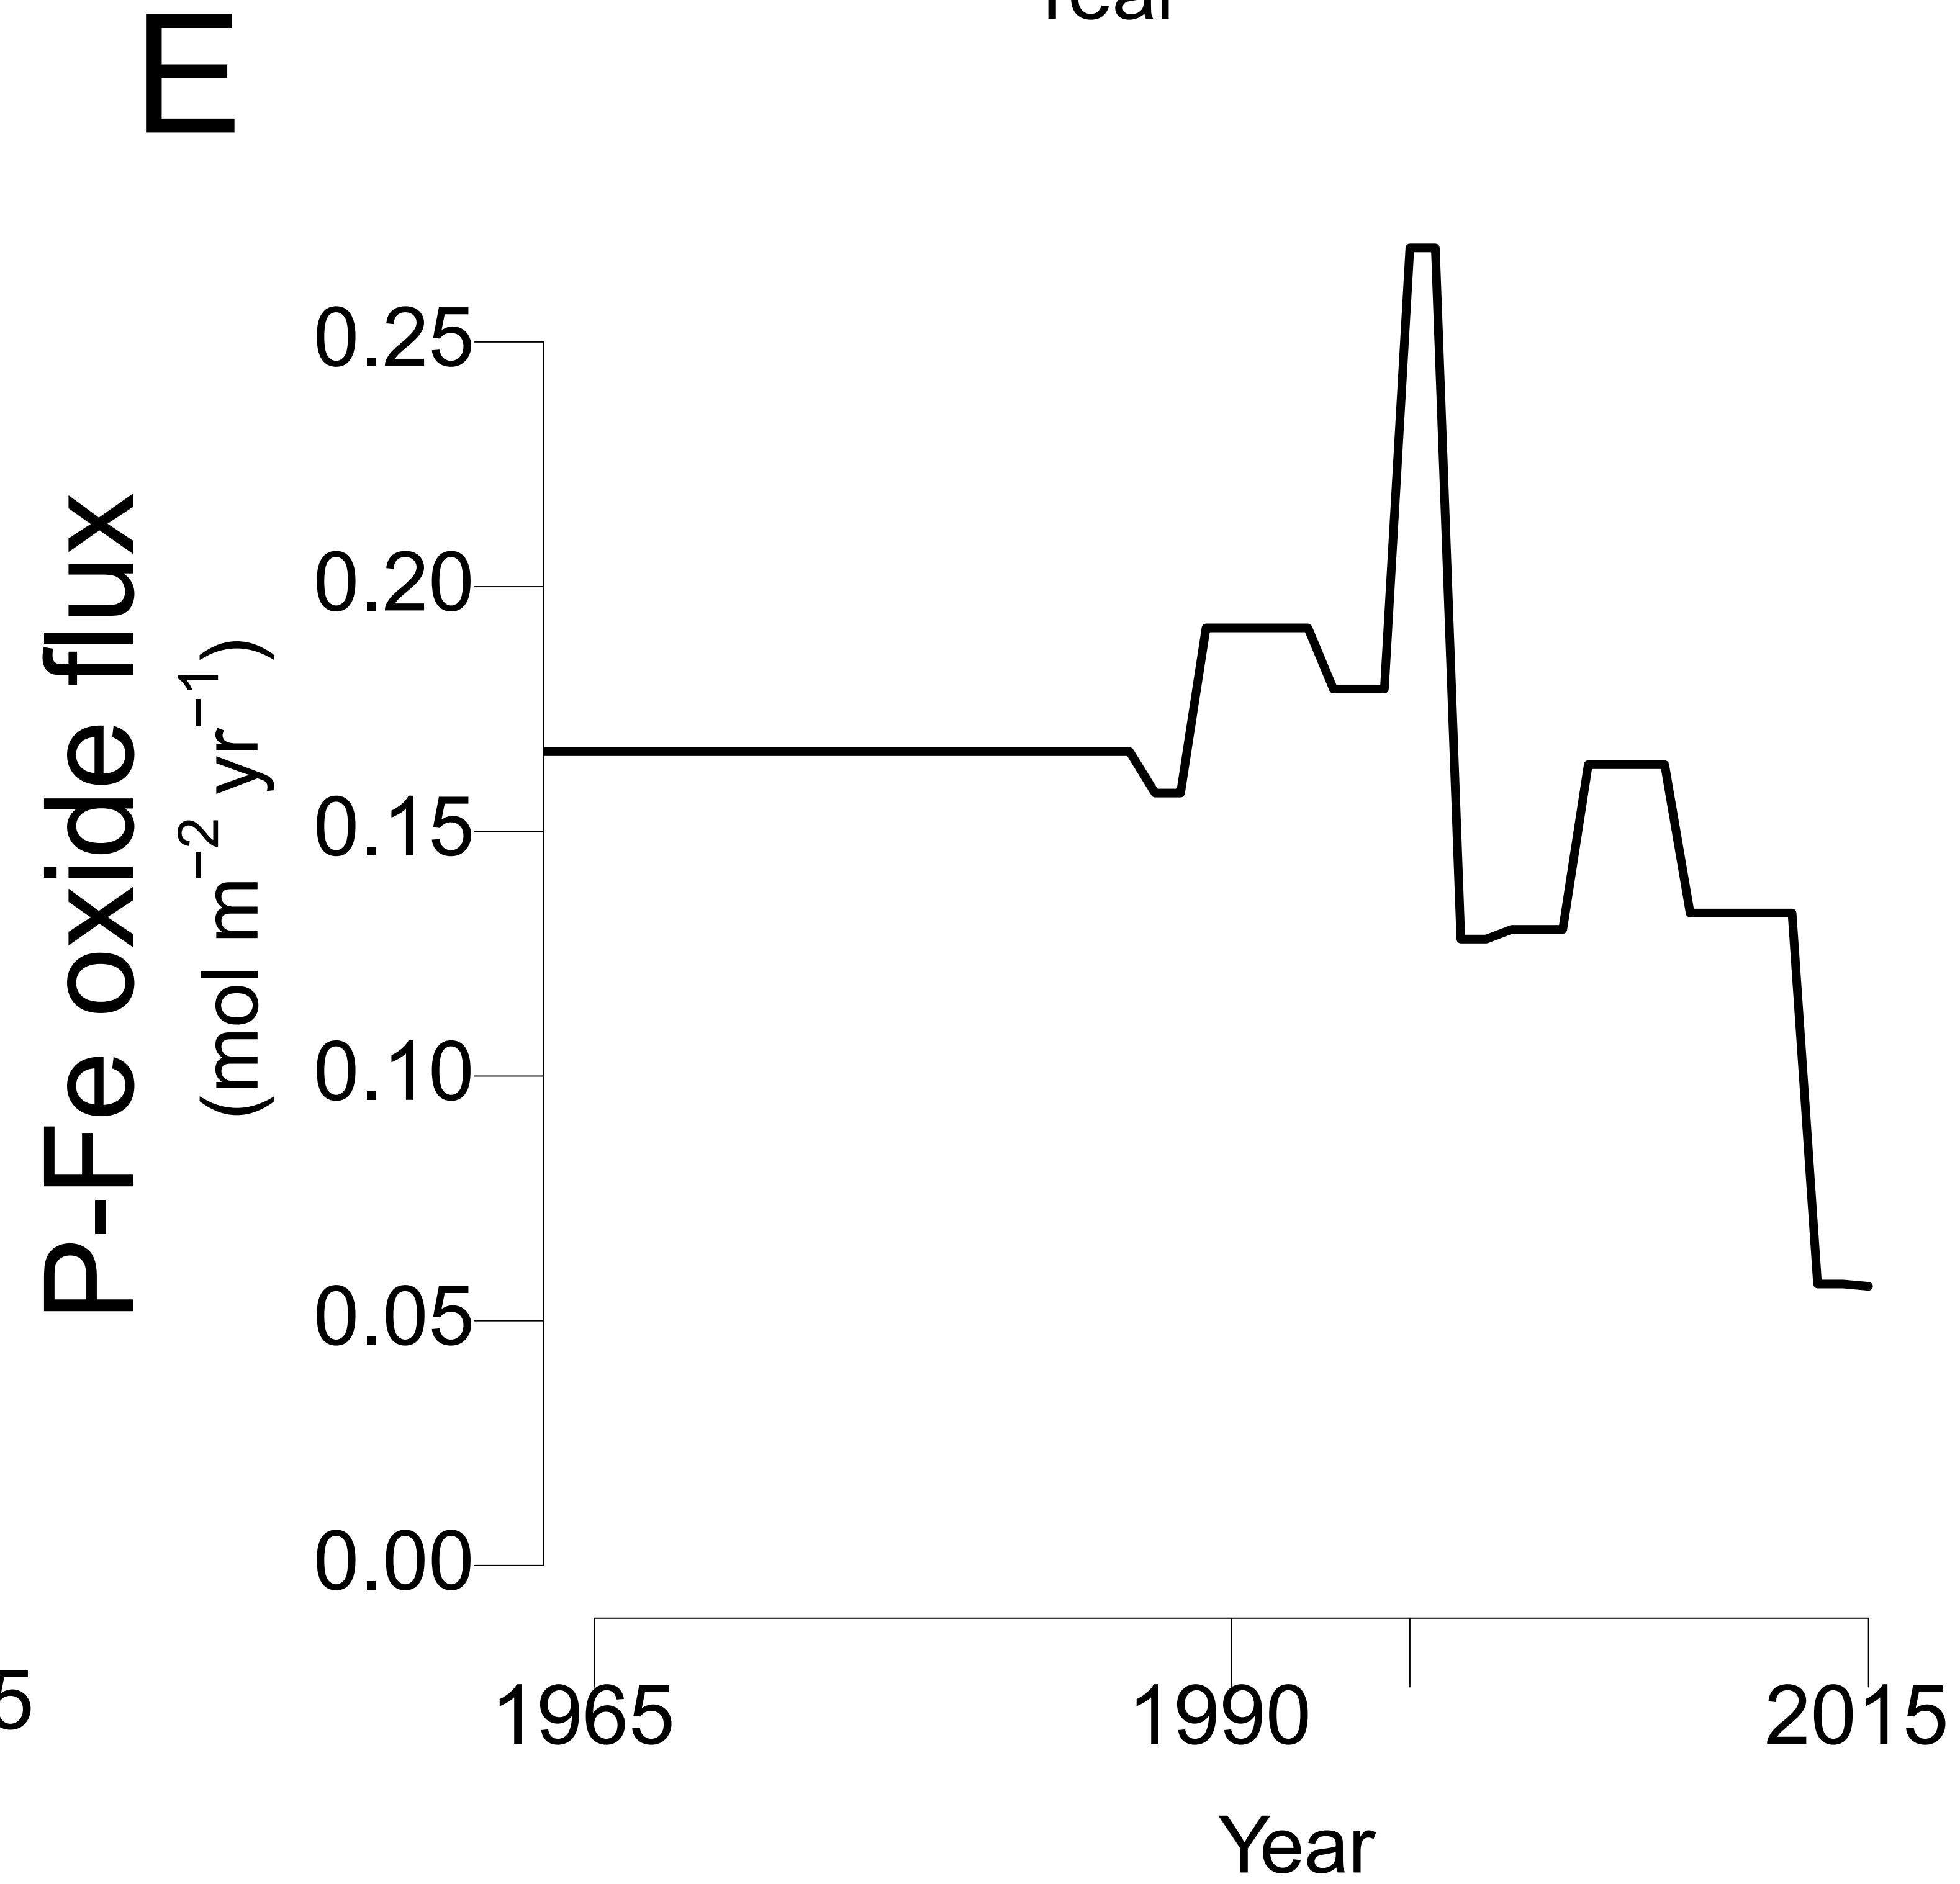

Supplement: Supplementary file 5 [file bg-15-6979-2018-supplement.zip]

# River discharge

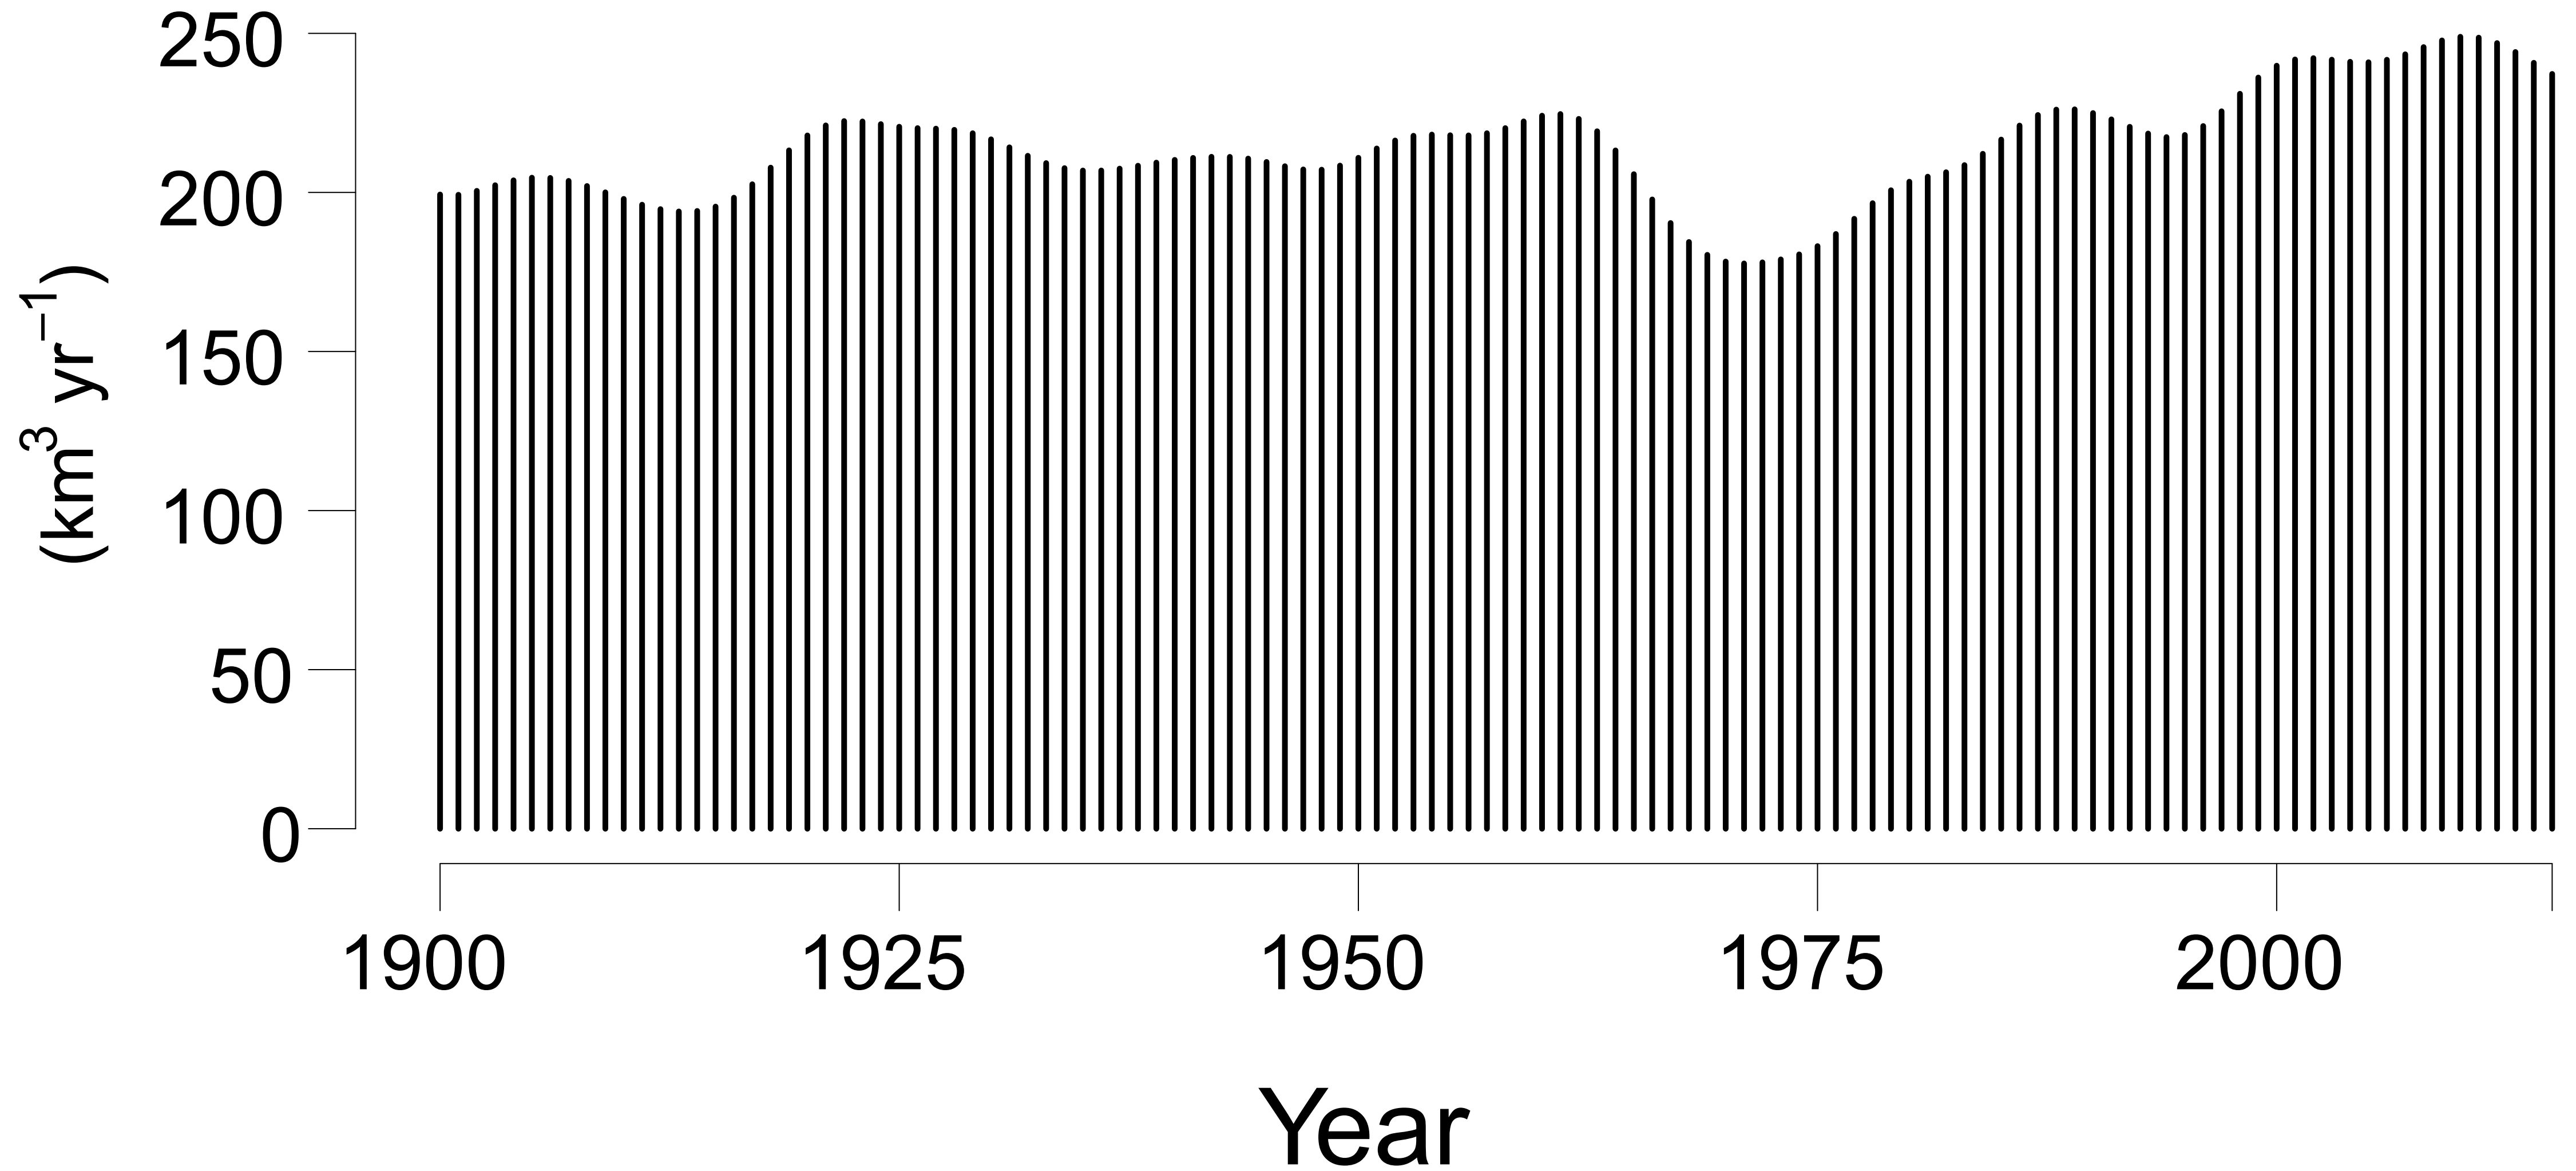

Supplement: Supplementary file 8 [file bg-15-6979-2018-supplement.zip]

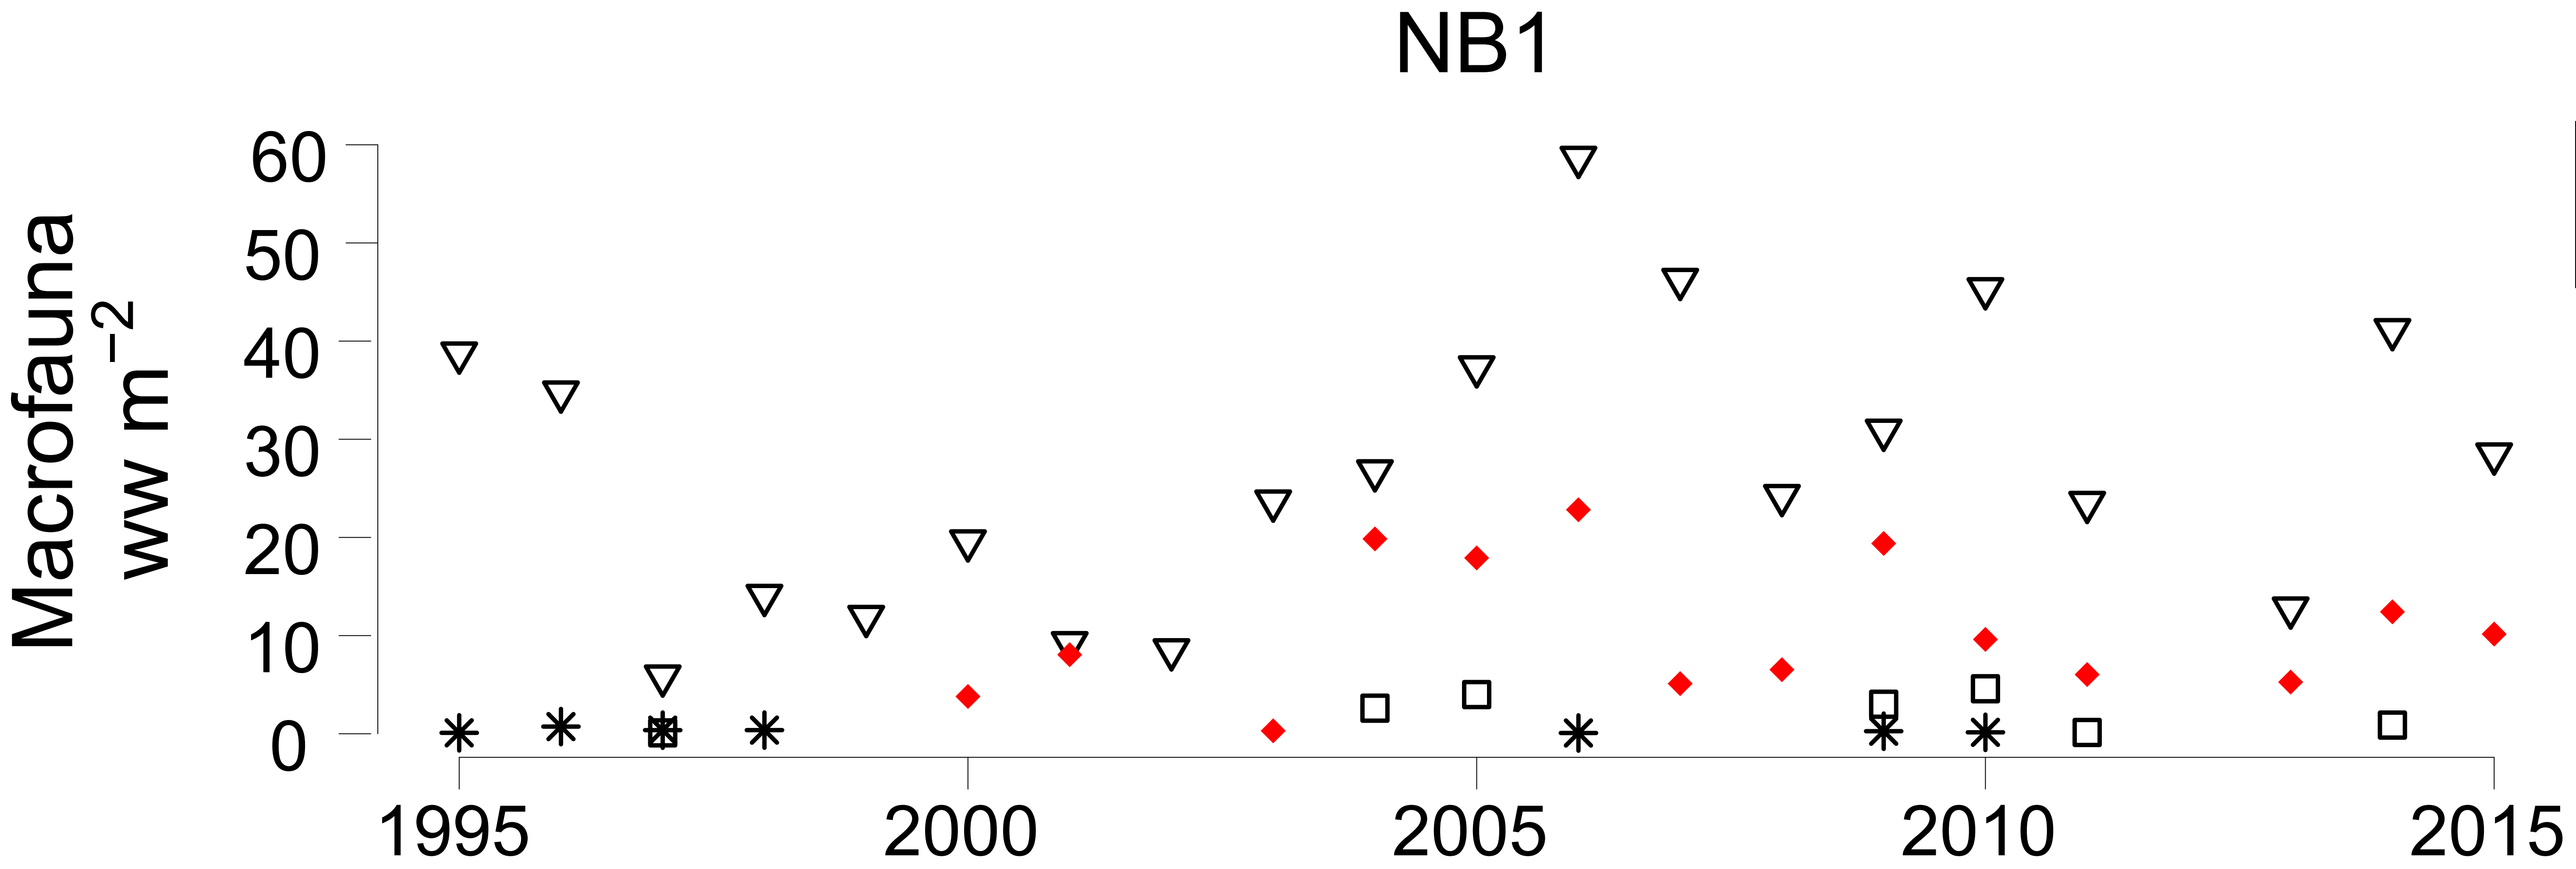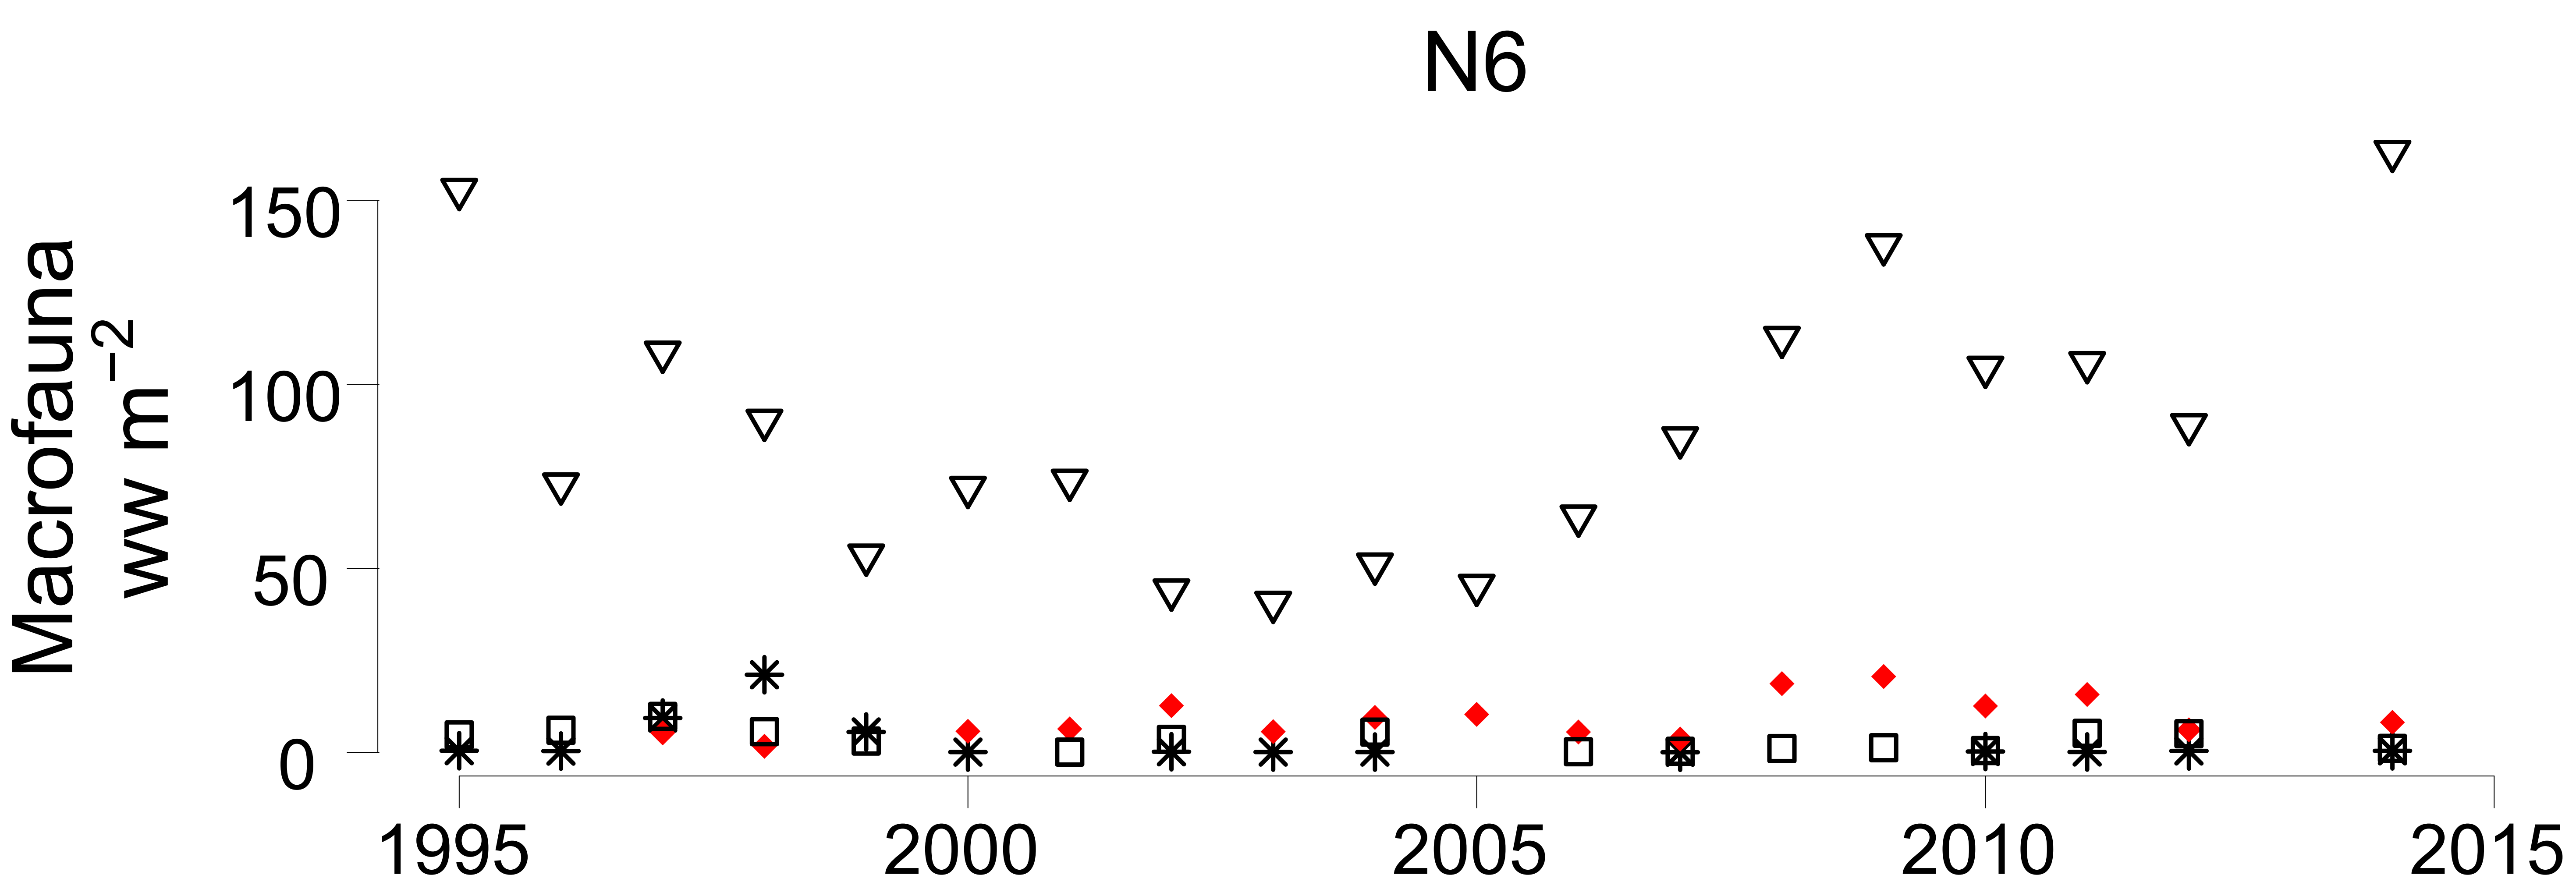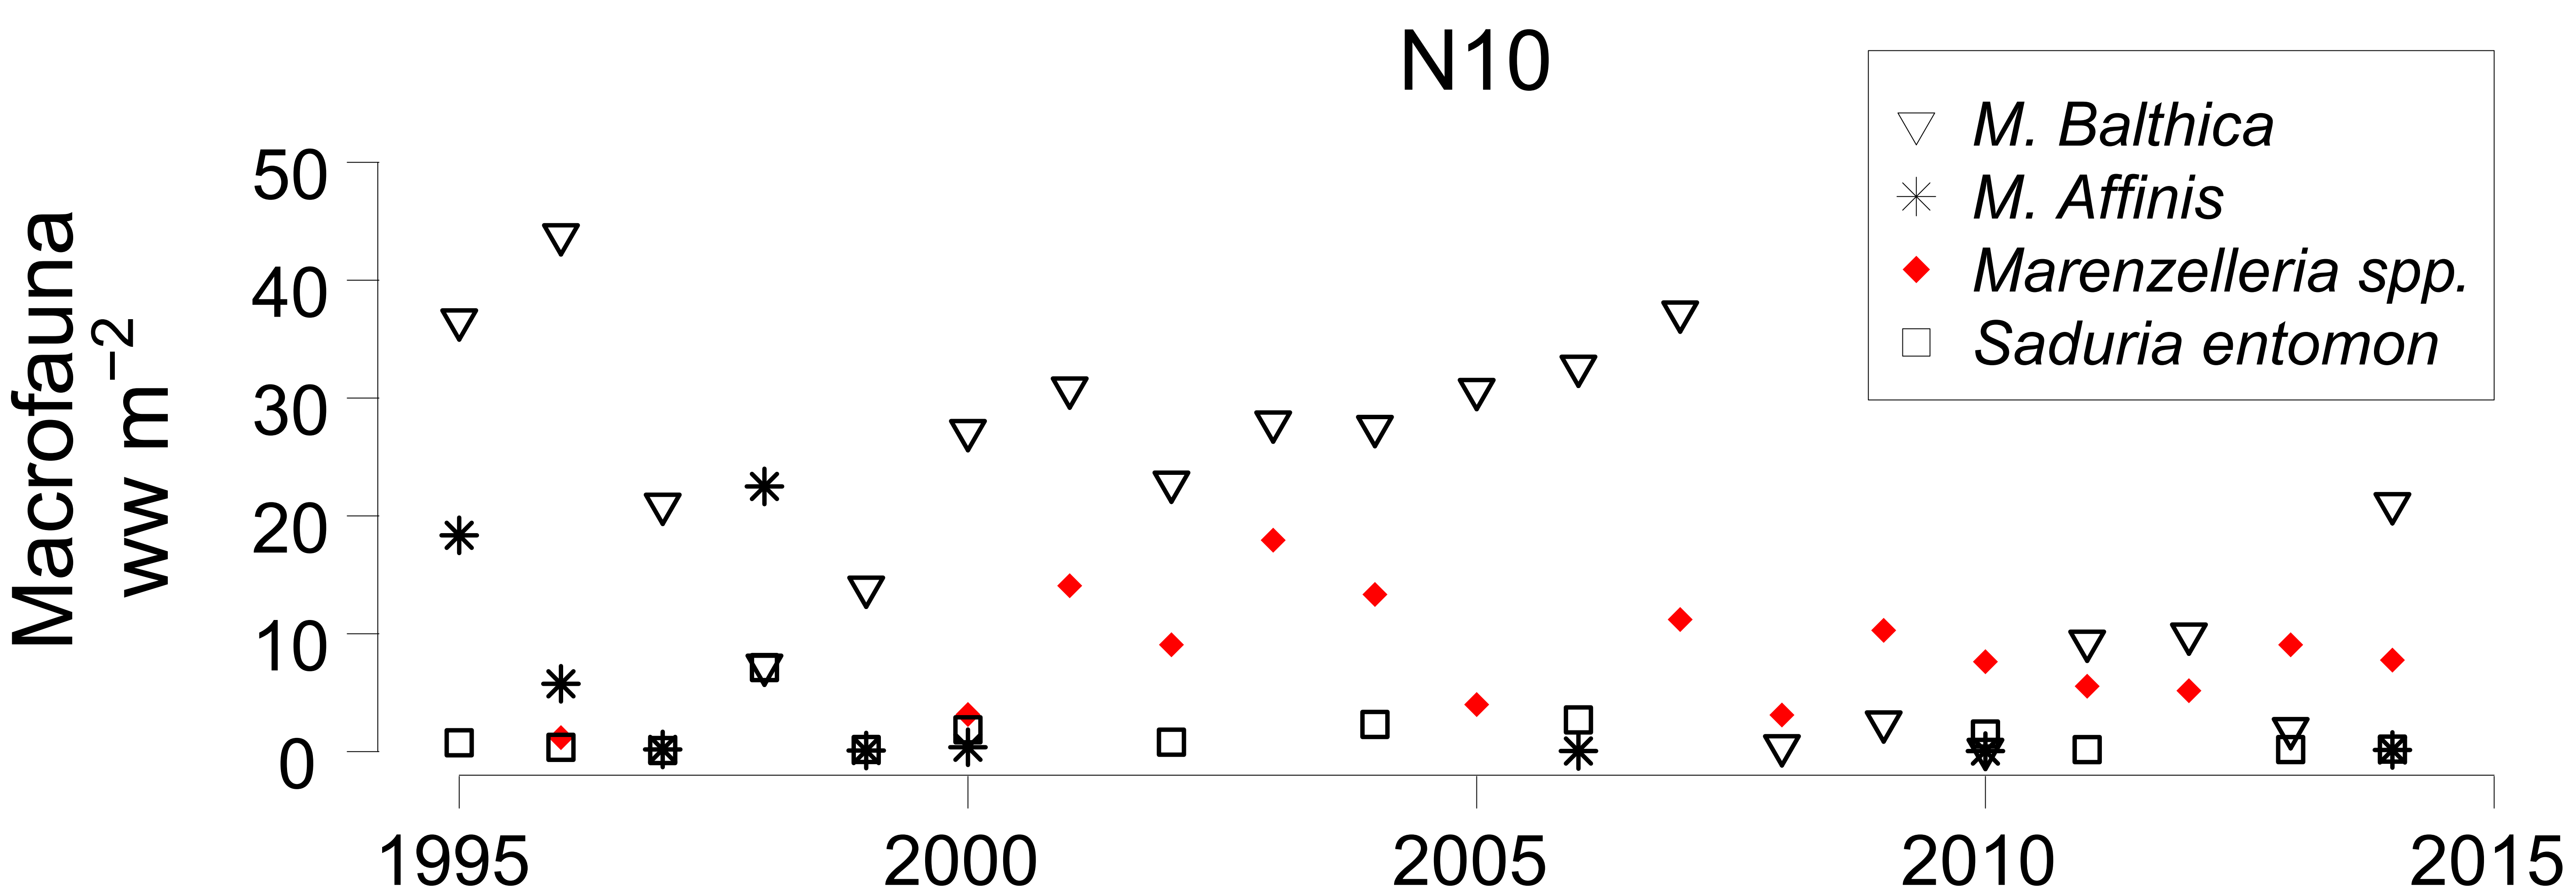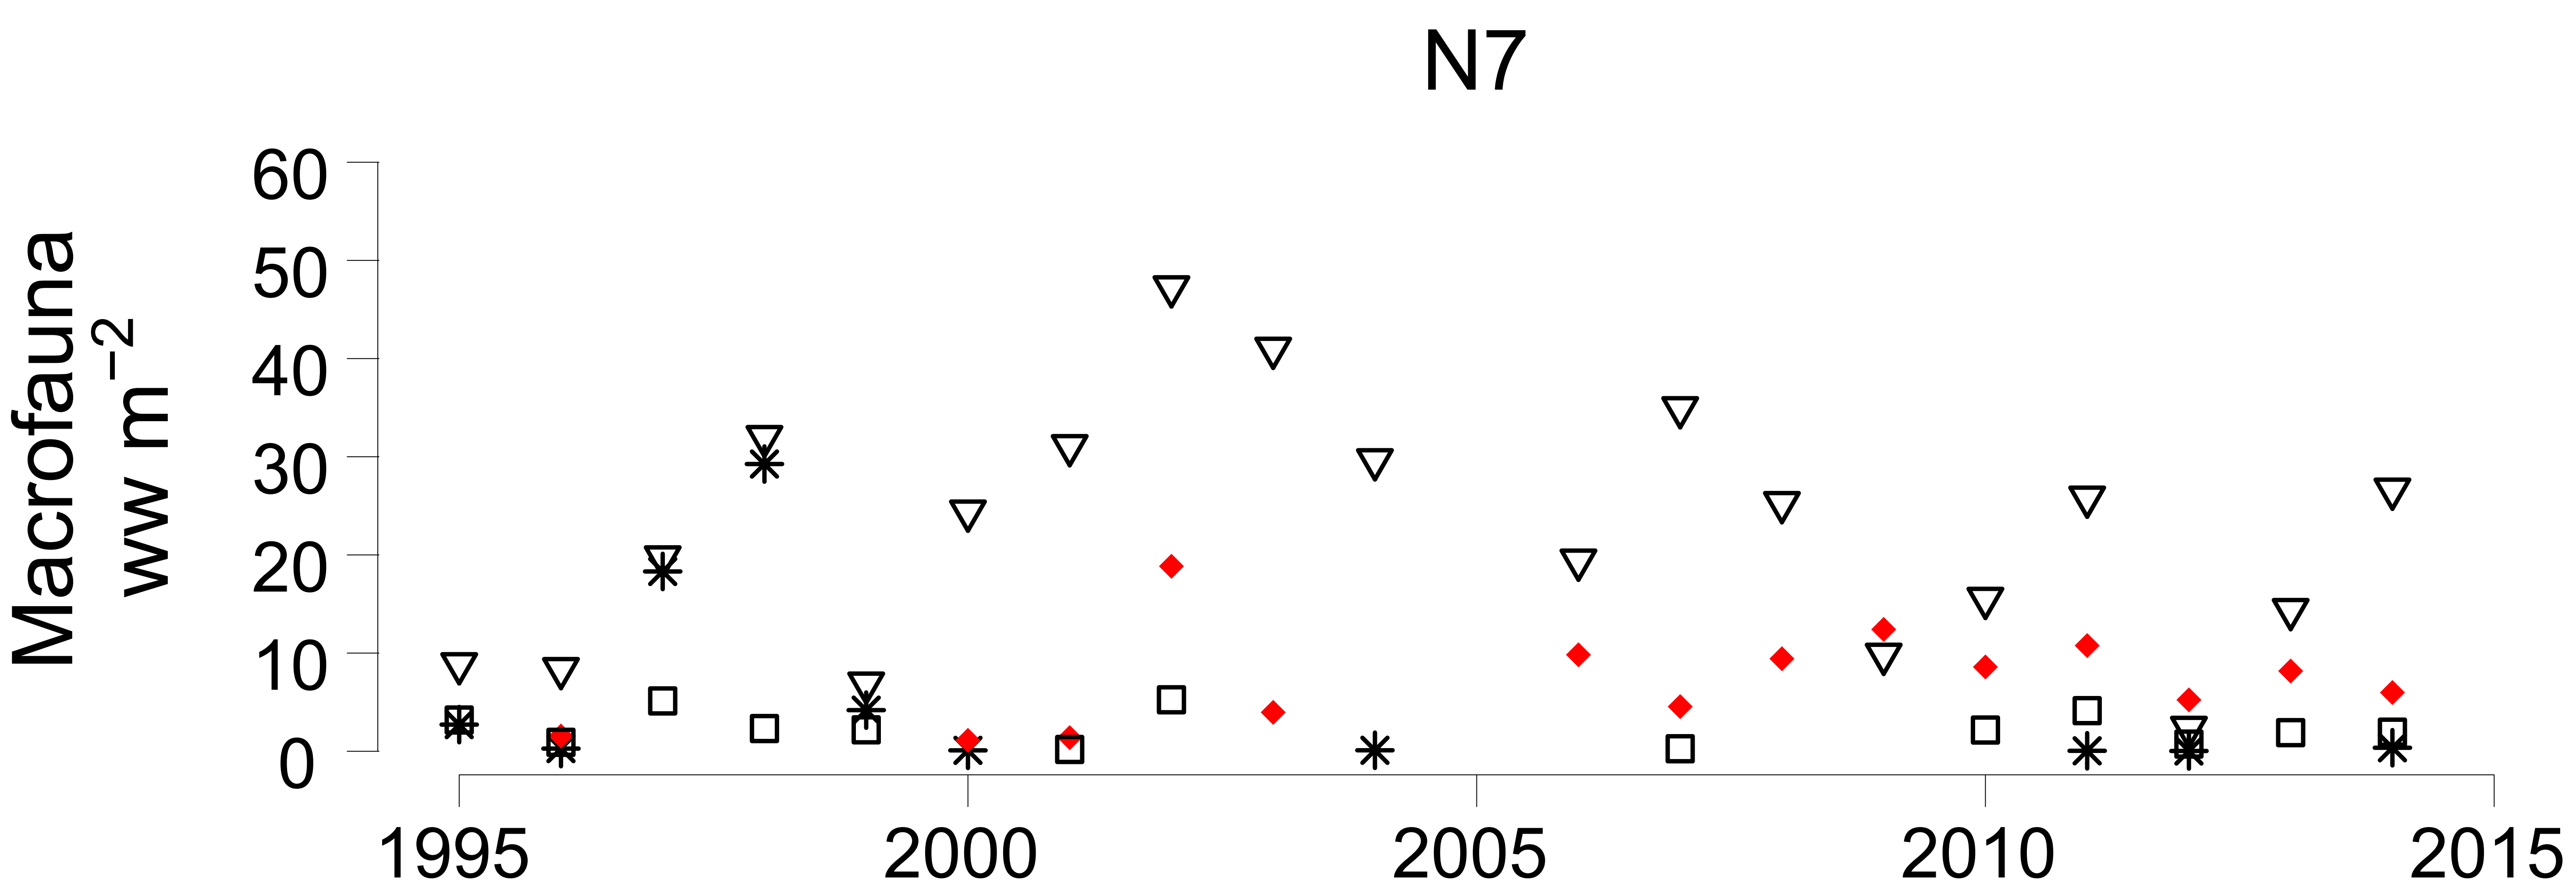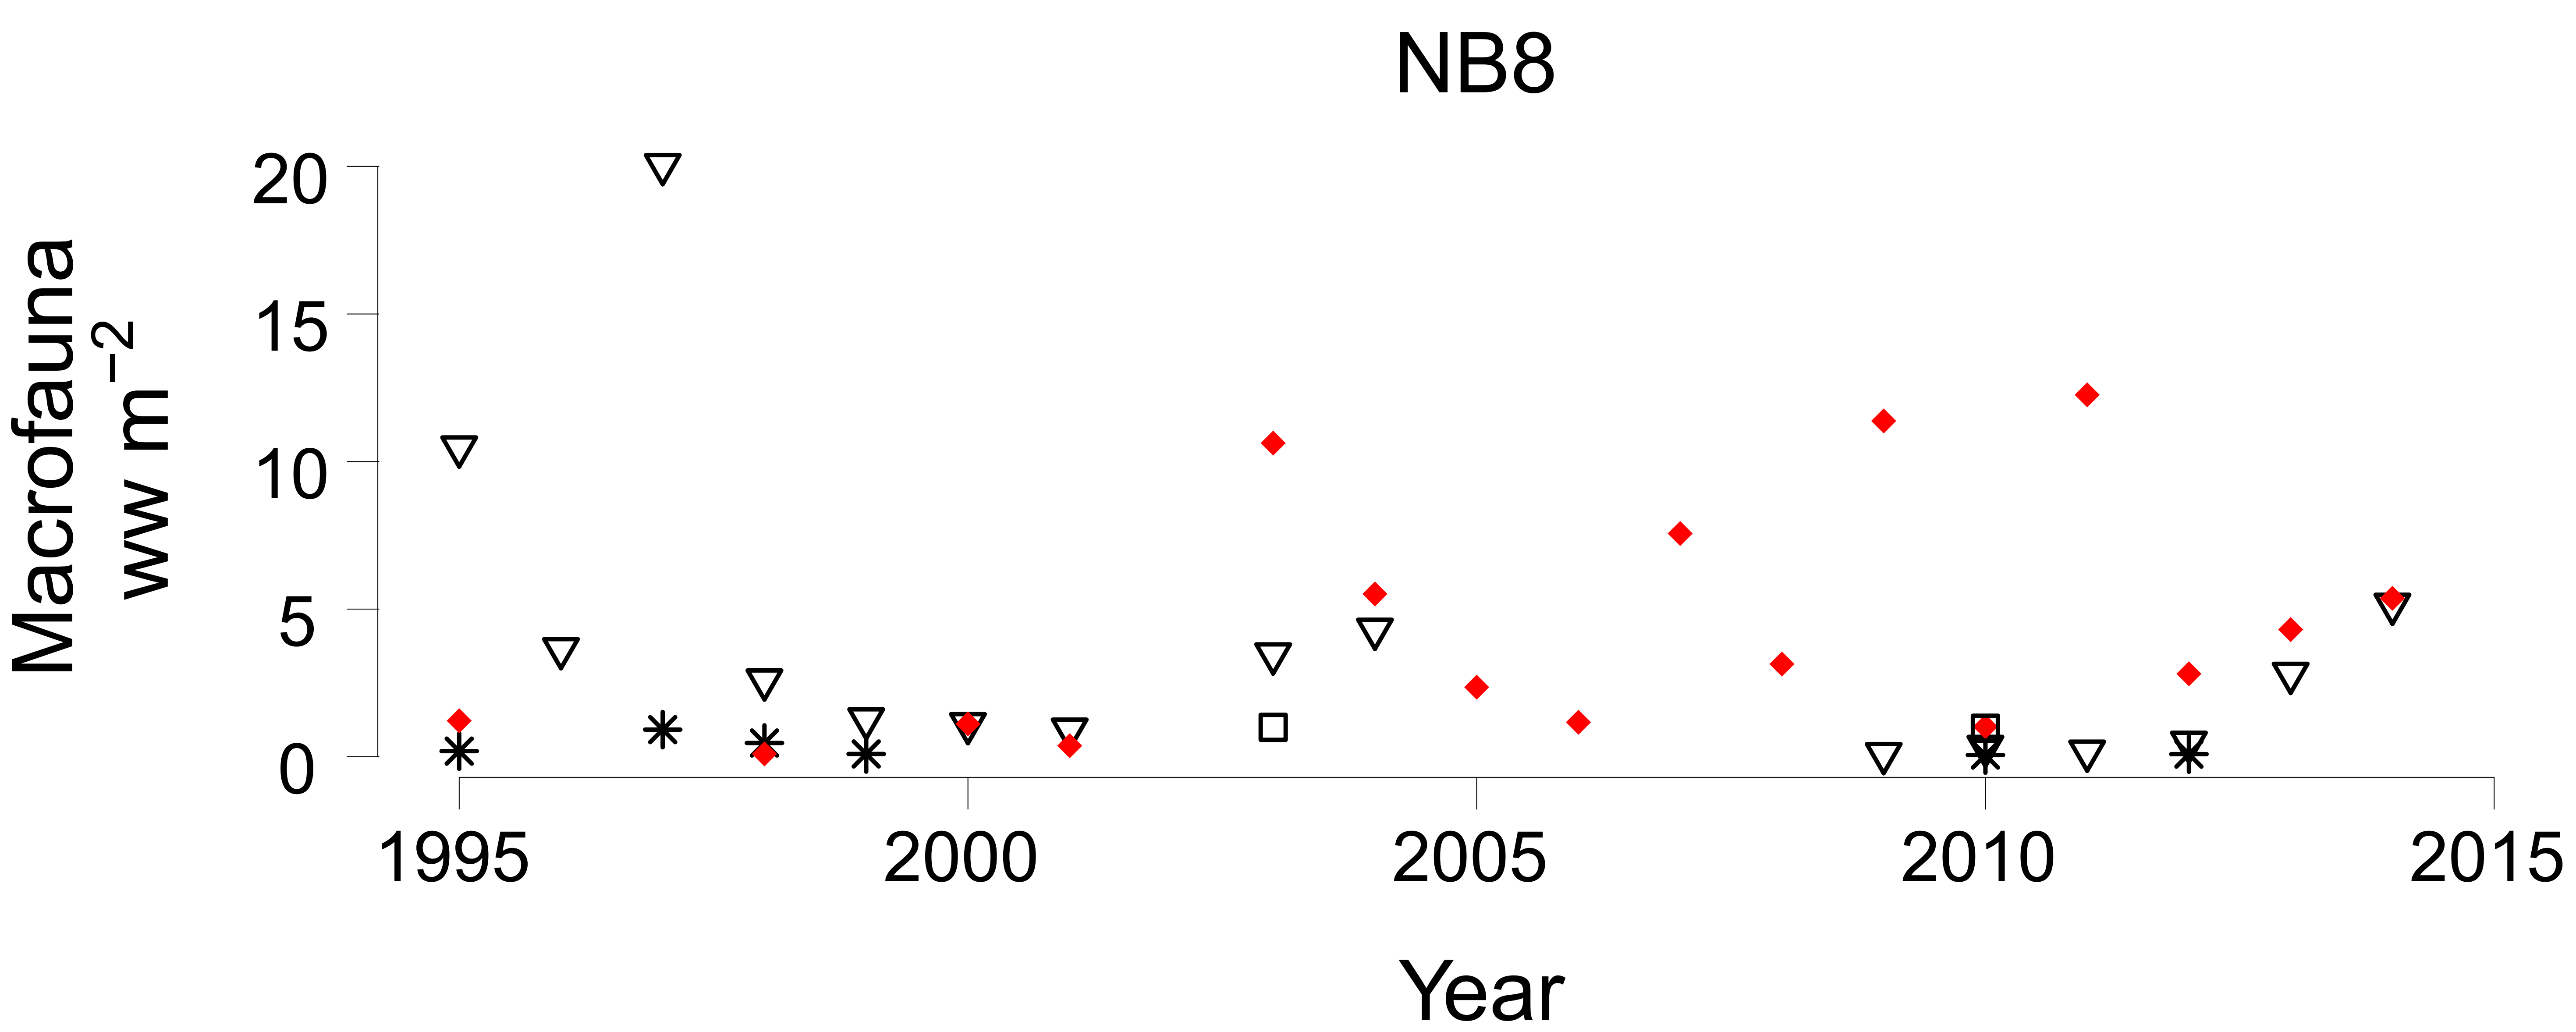

Supplement: Supplementary file 9 [file bg-15-6979-2018-supplement.zip]

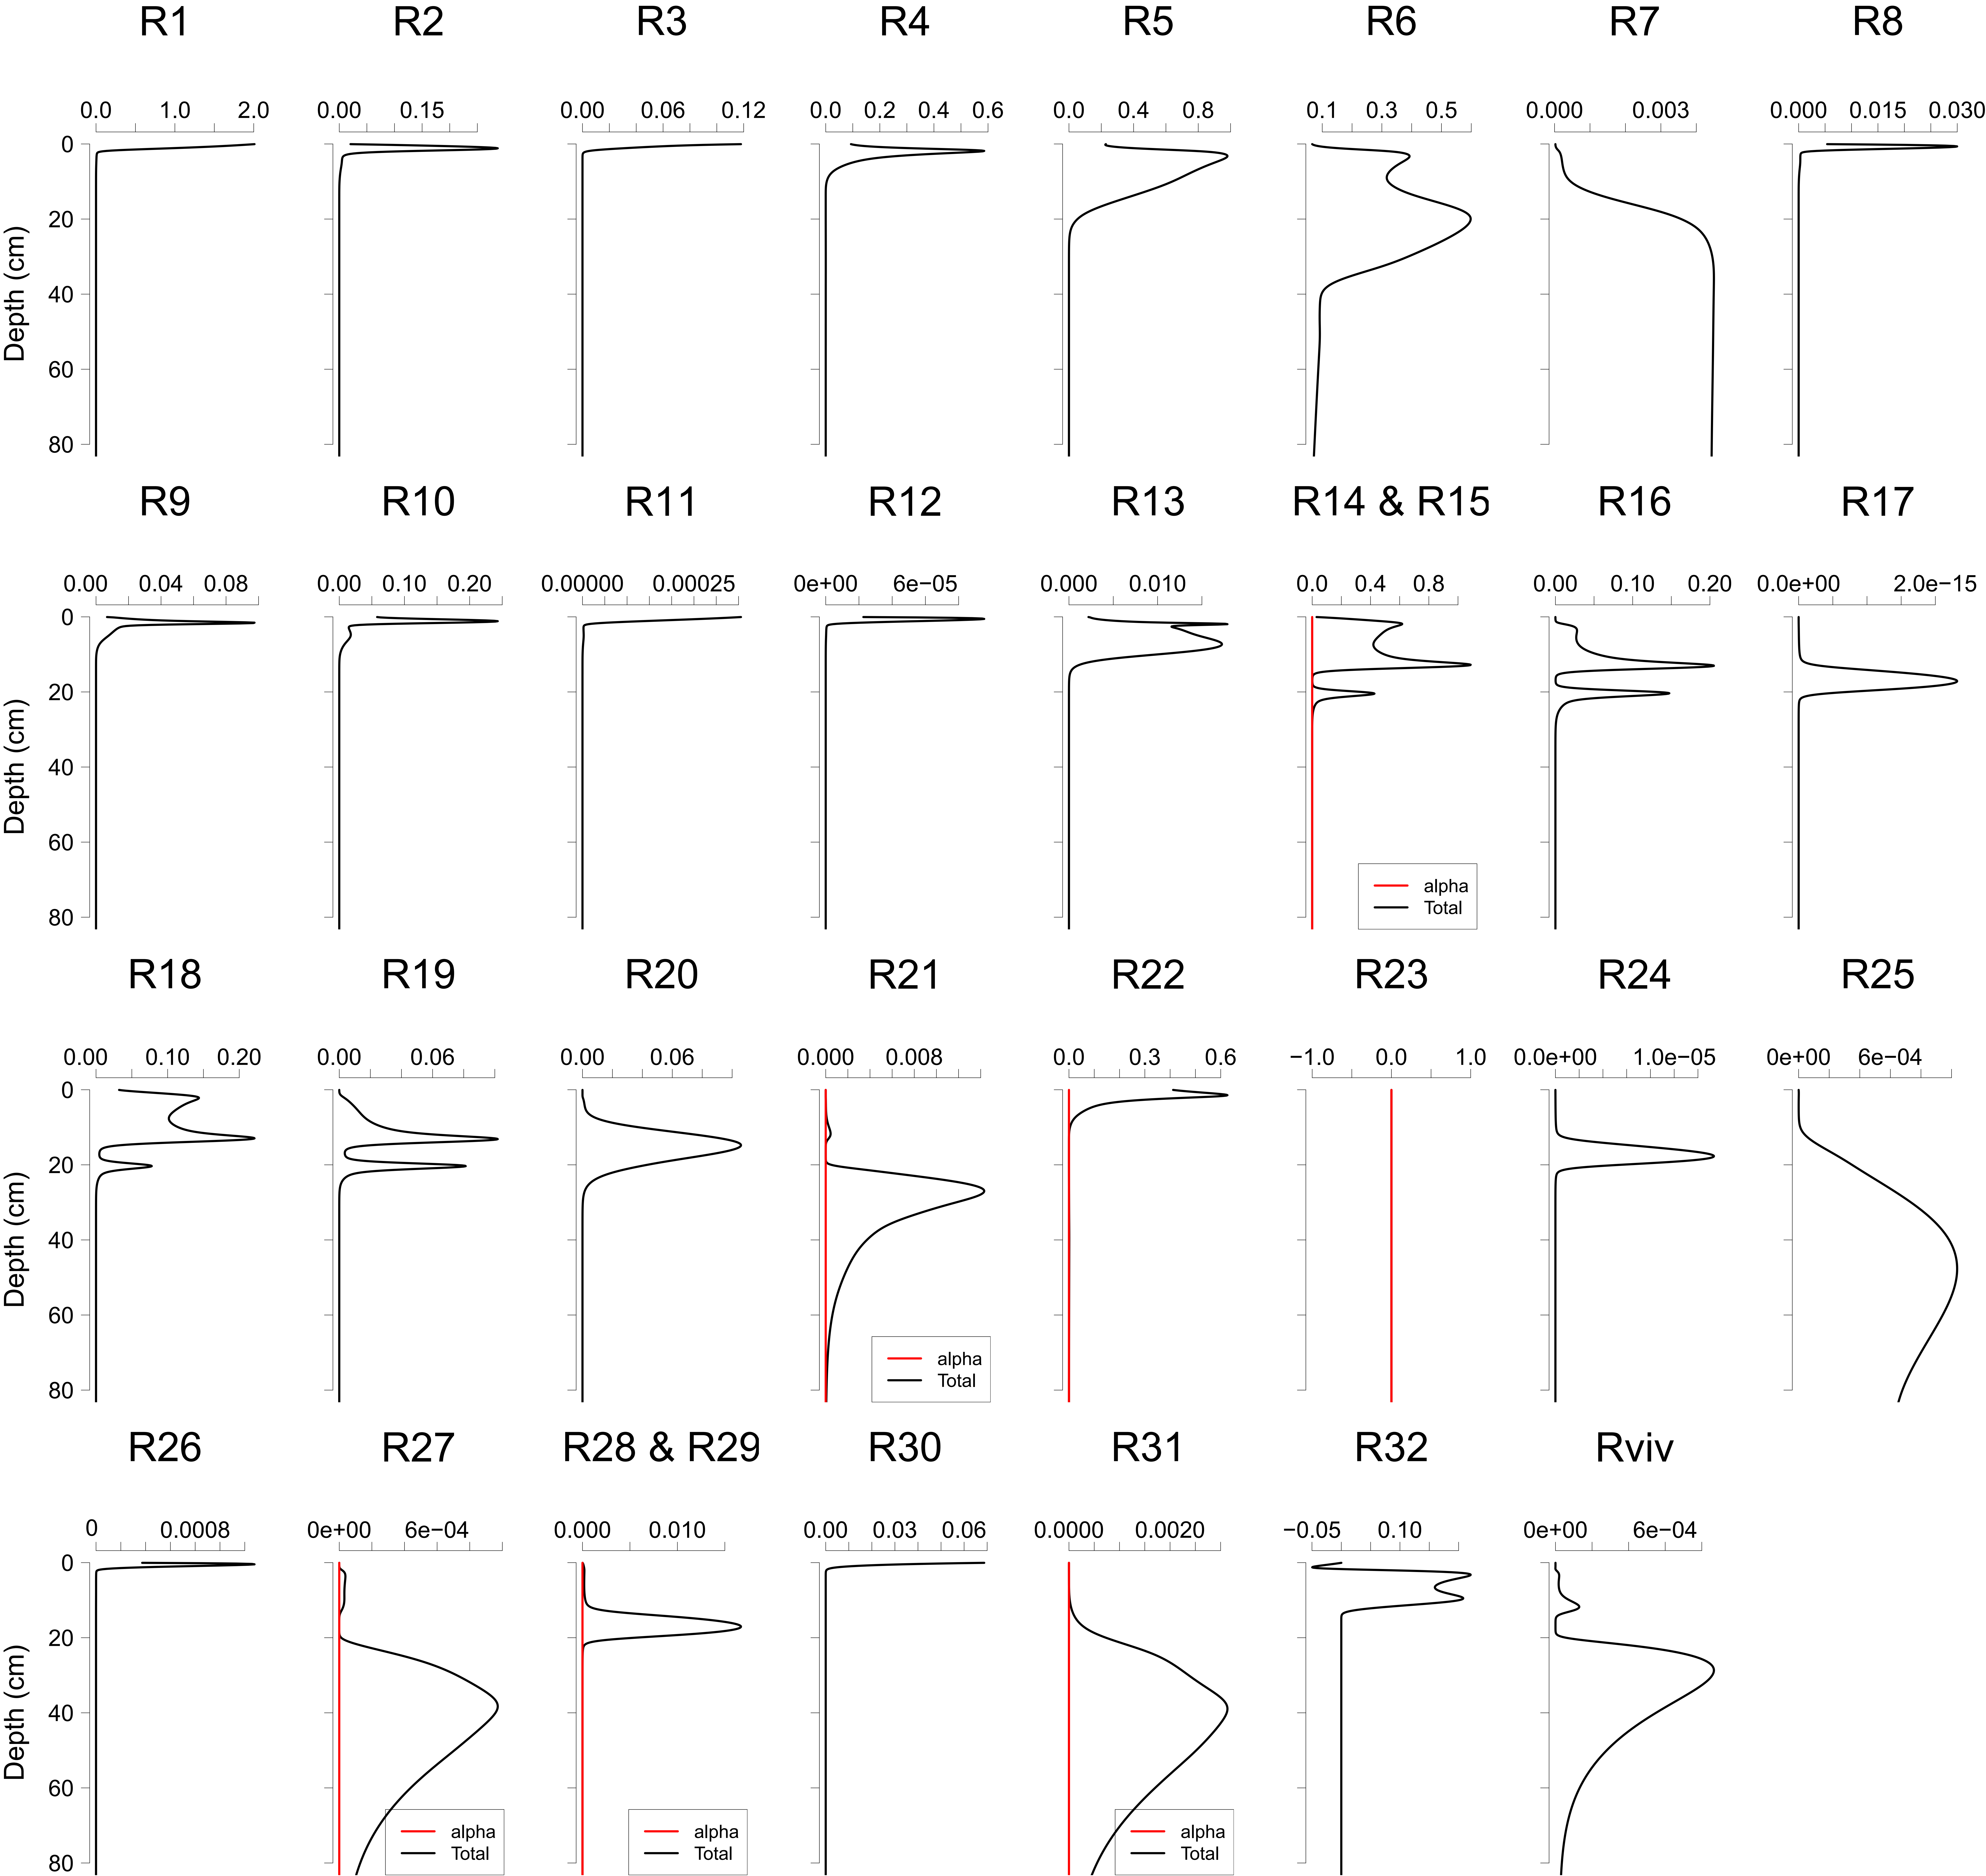

Supplement: Supplementary file 10 [file bg-15-6979-2018-supplement.zip]
